# Supplementary material for: Fructose 1,6-bisphosphate aldolase/phosphatase may be an ancestral gluconeogenic enzyme
Source: Springer Nature journal article supplement (doi:10.1038/nature08884), 2010-03-28
Supplement: 41586_2010_BFnature08884_MOESM272_ESM.pdf [file 41586_2010_BFnature08884_MOESM272_ESM.pdf]

## SUPPLEMENTARY INFORMATION

## Supplementary Figures

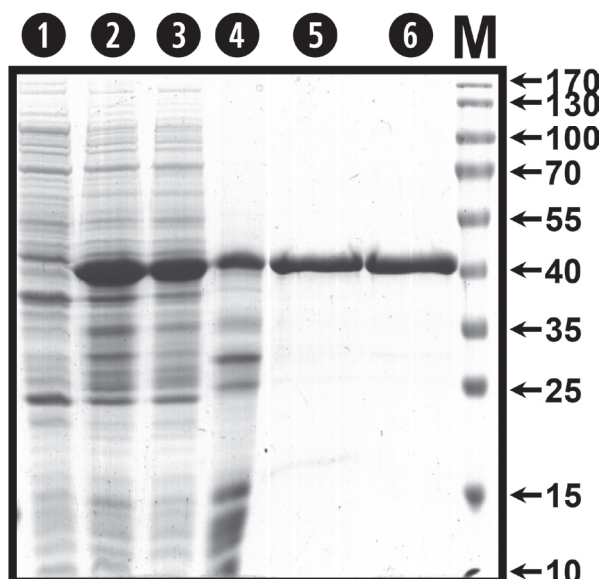

Figure S11 Purification of recombinant FBP aldolase/phosphatase of *I. hospitalis* from *E. coli* cells. SDS-PAGE of: lane 1, cells before induction; lane 2, cells after induction; lane 3, soluble fraction after ultracentrifugation at  $100,000 \times g$ ; lane 4, supernatant after 30 minutes of heat precipitation at  $80^\circ\text{C}$ ; lane 5, eluate after gel filtration; lane 6, eluate after MonoQ anion exchange chromatography; lane M, molecular mass markers (size in kDa).

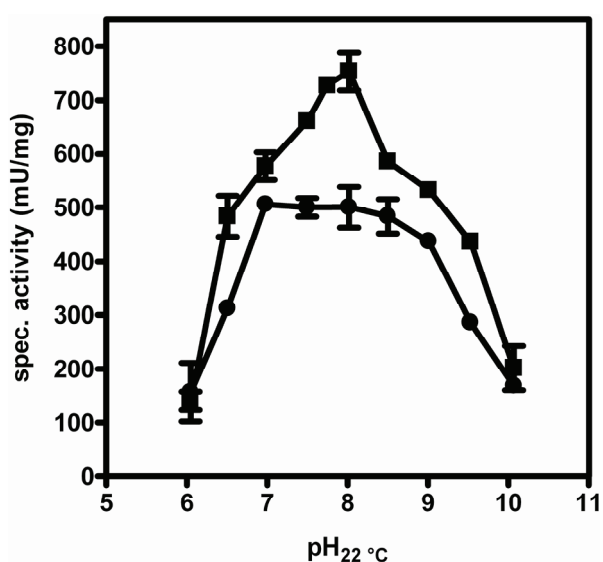

Figure S12 Effect of pH on FBP aldolase (●) and FBP phosphatase (■) activities of the FBP aldolase/phosphatase from *I. hospitalis*. Error bars represent the standard deviation of at least two independent measurements.

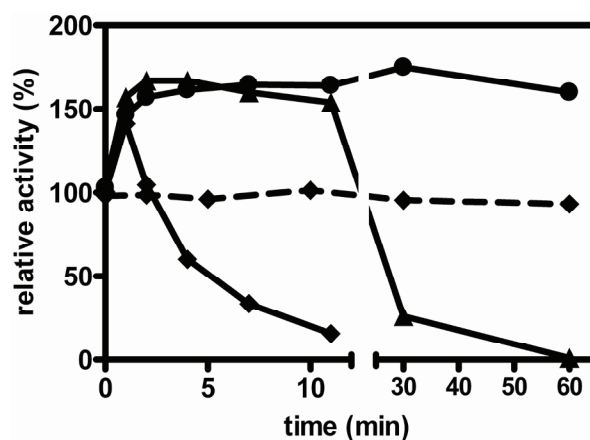

Figure S13 Heat stability of FBP aldolase/phosphatase from *C. symbiosum* and *I. hospitalis*. The *C. symbiosum* enzyme was incubated at  $97^\circ\text{C}$  (♦),  $82^\circ\text{C}$  (▲),  $67^\circ\text{C}$  (●) and the remaining activity was determined. For comparison the *I. hospitalis* enzyme (dashed line) was incubated at  $97^\circ\text{C}$ .

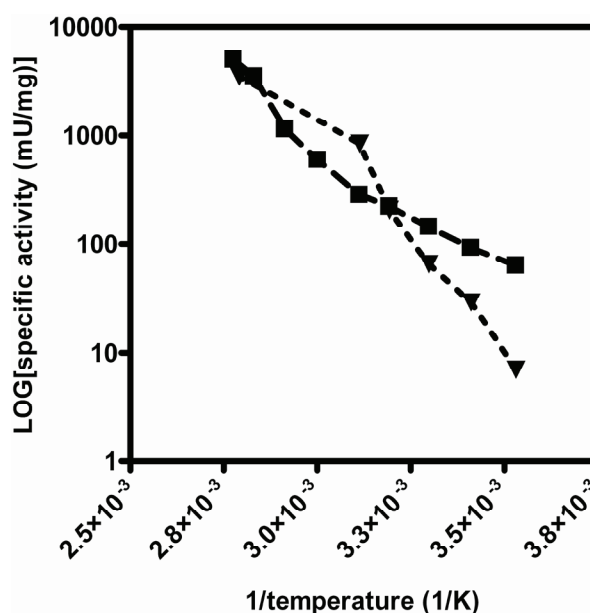

Figure S14 Temperature dependence of FBP aldolase/phosphatase activity. The graph shows an Arrhenius plot of FBP phosphatase activity of the hyperthermophilic *Ignicoccus* (▼) and the mesophilic *Cenarchaeum* (■) enzyme.

|                                | 10                                                                | 20                                                                                                 | 30 | 40 | 50 | 60 | 70 | 80 | 90 | 100 |
|--------------------------------|-------------------------------------------------------------------|----------------------------------------------------------------------------------------------------|----|----|----|----|----|----|----|-----|
| Aciduliprofundum boonei 1      | ..... ..... ..... ..... ..... ..... ..... ..... ..... ..... ..... | MDKITISLIKADVGGVPGHSTVHPDLIETAKEALQKAKDEHILEDPHVTVGDDDLQIMTHRRKGVDSSEIHK-LAWNTFEKA                 |    |    |    |    |    |    |    |     |
| Aciduliprofundum boonei 2      | ..... ..... ..... ..... ..... ..... ..... ..... ..... ..... ..... | MDKITISLIKADVGGVPGHSTVHPDLIETAKEALQKAKDEHILEDPHVTVGDDDLQIMTHRRKGVDSSEIHK-LAWNTFEKA                 |    |    |    |    |    |    |    |     |
| Aeropyrum pernix               | ..... ..... ..... ..... ..... ..... ..... ..... ..... ..... ..... | MSGRTTTSVIKADIGSLAGHRRVHPDITLAAASRVLAERAKRKGVIKSFYVFNAGDDDLQIMTHRRKGVDSSEIHK-LAWNTFEKA             |    |    |    |    |    |    |    |     |
| Aquifex aeolicus               | ..... ..... ..... ..... ..... ..... ..... ..... ..... ..... ..... | -----MKVTVSLIKADIGGFGVHSSHPDVAVREHVEKEVEKGNLIDCDLITCGDDIAIVMTHRGGVDSSEIHK-LAWNTFEKA                |    |    |    |    |    |    |    |     |
| Archaeoglobus fulgidus         | ..... ..... ..... ..... ..... ..... ..... ..... ..... ..... ..... | -----MRKVTVSLIKADVGSVAGHTTVPDELKKAEBENLKNVDSGLIIDFRVFNAGDDLELLMTHRGGVDSSEIHK-LAWNTFEKA             |    |    |    |    |    |    |    |     |
| Bradyrhizobium japonicum       | ..... ..... ..... ..... ..... ..... ..... ..... ..... ..... ..... | -----MRLTVSLIKADVGSVGGHTKPSRRMATEVEGEVAKAICNGLLIDGFCITGDDIAIVMTHRGGVDSSEIHK-LAWNTFEKA              |    |    |    |    |    |    |    |     |
| Caldivirga maquilingensis      | ..... ..... ..... ..... ..... ..... ..... ..... ..... ..... ..... | MAPKTTVSVIKADIGGIPGHAMVHPKILEYASSRRLRAVKSGLLIDYVFNAGDDMSLIMTHRRKGVDSSEIHK-LAWNTFEKA                |    |    |    |    |    |    |    |     |
| Candidatus Desulforudis audax  | ..... ..... ..... ..... ..... ..... ..... ..... ..... ..... ..... | MDKTTVSLIKADIGGFGVHSSHPDLELAKKAGILSG---SPLLIDFHVTVGDDINLILTHELGRNNGEITHG-LAWNTFEKA                 |    |    |    |    |    |    |    |     |
| Candidatus Korarchaeum cryptof | ..... ..... ..... ..... ..... ..... ..... ..... ..... ..... ..... | -----MVRTTVSVIKADIGGLAGHHVHPKLEIAASELAEAKSSRIEDFYITVSGDDDLQIMTHRRKGVDSSEIHK-LAWNTFEKA              |    |    |    |    |    |    |    |     |
| Candidatus Methanoregula boone | ..... ..... ..... ..... ..... ..... ..... ..... ..... ..... ..... | -----MPKTTVSVIKADVGSFPGHSHRAHPKLEIAAQLRAE-RGKLLDSFVTVGDDLELVMTSHRGGVDSSEIHK-LAWNTFEKA              |    |    |    |    |    |    |    |     |
| Carboxyibrachium pacificum     | ..... ..... ..... ..... ..... ..... ..... ..... ..... ..... ..... | -----MS-KITVTVSVIKADIGGFGVHSSHPDLELAKKAGILSG---SPLLIDFHVTVGDDINLILTHELGRNNGEITHG-LAWNTFEKA         |    |    |    |    |    |    |    |     |
| Carboxythermus hydrogenoform   | ..... ..... ..... ..... ..... ..... ..... ..... ..... ..... ..... | -----MG-KITVTVSVIKADVGSFPGHSHRAHPKLEIAAQLRAE-RGKLLDSFVTVGDDLELVMTSHRGGVDSSEIHK-LAWNTFEKA           |    |    |    |    |    |    |    |     |
| Cenarchaeum symbiosum          | ..... ..... ..... ..... ..... ..... ..... ..... ..... ..... ..... | -----VRIITVSAIKADVGGIGGHTLPSGGLLDAVRRKVS---SSS-LLIDHYIGYCGDDSHVIMTHRRKGVDSSEIHK-LAWNTFEKA          |    |    |    |    |    |    |    |     |
| Coxiella burnetii              | ..... ..... ..... ..... ..... ..... ..... ..... ..... ..... ..... | -----MEITVSAIKADVGSIGGHTLPSGGLLDAVRRKVS---SSS-LLIDHYIGYCGDDSHVIMTHRRKGVDSSEIHK-LAWNTFEKA           |    |    |    |    |    |    |    |     |
| Dehalococcoides ethenogenes    | ..... ..... ..... ..... ..... ..... ..... ..... ..... ..... ..... | -----MKVTVSLIKADIGGFGVHSSHPDQCLVRAEKHLAEAKKGNLIDYHITKCGDDLQIMTHRRKGVDSSEIHK-LAWNTFEKA              |    |    |    |    |    |    |    |     |
| Dehalococcoides sp.            | ..... ..... ..... ..... ..... ..... ..... ..... ..... ..... ..... | -----MKVTVSLIKADIGGFGVHSSHPDQCLVRAEKHLAEAKKGNLIDYHITKCGDDLQIMTHRRKGVDSSEIHK-LAWNTFEKA              |    |    |    |    |    |    |    |     |
| Desulfurococcus kamchatkensis  | ..... ..... ..... ..... ..... ..... ..... ..... ..... ..... ..... | -----MGMKITVSVIKADIGSLAGHRRVHPDITLAAASRVLAERAKRKGVIKSFYVFNAGDDDLQIMTHRRKGVDSSEIHK-LAWNTFEKA        |    |    |    |    |    |    |    |     |
| Hydrogenivirga sp.             | ..... ..... ..... ..... ..... ..... ..... ..... ..... ..... ..... | -----MKITVTVSVIKADIGGFGVHSSHPDLELAKKAGILSG---SPLLIDFHVTVGDDINLILTHELGRNNGEITHG-LAWNTFEKA           |    |    |    |    |    |    |    |     |
| Hydrogenobaculum sp.           | ..... ..... ..... ..... ..... ..... ..... ..... ..... ..... ..... | -----MKITVTVSVIKADIGGFGVHSSHPDLELAKKAGILSG---SPLLIDFHVTVGDDINLILTHELGRNNGEITHG-LAWNTFEKA           |    |    |    |    |    |    |    |     |
| Hyperthermus butylicus         | ..... ..... ..... ..... ..... ..... ..... ..... ..... ..... ..... | -----MGEERRVTVSVIKADIGSLAGHRRVHPDITLAAASRVLAERAKRKGVIKSFYVFNAGDDDLQIMTHRRKGVDSSEIHK-LAWNTFEKA      |    |    |    |    |    |    |    |     |
| Ignicoccus hospitalis          | ..... ..... ..... ..... ..... ..... ..... ..... ..... ..... ..... | -----MAQKTTVSVIKADIGSLAGHRRVHPDITLAAASRVLAERAKRKGVIKSFYVFNAGDDDLQIMTHRRKGVDSSEIHK-LAWNTFEKA        |    |    |    |    |    |    |    |     |
| Metallosphaera sedula          | ..... ..... ..... ..... ..... ..... ..... ..... ..... ..... ..... | -----MRSTVTVSVIKADIGSLAGHRRVHPDITLAAASRVLAERAKRKGVIKSFYVFNAGDDDLQIMTHRRKGVDSSEIHK-LAWNTFEKA        |    |    |    |    |    |    |    |     |
| Methanobrevibacter smithii     | ..... ..... ..... ..... ..... ..... ..... ..... ..... ..... ..... | -----MKTITVTVSVIKADIGSFGHSHRAHPKLEIAAQLRAE-RGKLLDSFVTVGDDLELVMTSHRGGVDSSEIHK-LAWNTFEKA             |    |    |    |    |    |    |    |     |
| Methanocaldococcus jannaschii  | ..... ..... ..... ..... ..... ..... ..... ..... ..... ..... ..... | -----MSRMENKTVSVIKADIGGFGVHSSHPDLELAKKAGILSG---SPLLIDFHVTVGDDINLILTHELGRNNGEITHG-LAWNTFEKA         |    |    |    |    |    |    |    |     |
| Methanococcus aeolicus         | ..... ..... ..... ..... ..... ..... ..... ..... ..... ..... ..... | -----MHGEKITVSVIKADVGGIGGHTLPSGGLLDAVRRKVS---SSS-LLIDHYIGYCGDDSHVIMTHRRKGVDSSEIHK-LAWNTFEKA        |    |    |    |    |    |    |    |     |
| Methanococcus maripaludis      | ..... ..... ..... ..... ..... ..... ..... ..... ..... ..... ..... | -----MEEKVTVSVIKADVGGIGGHTLPSGGLLDAVRRKVS---SSS-LLIDHYIGYCGDDSHVIMTHRRKGVDSSEIHK-LAWNTFEKA         |    |    |    |    |    |    |    |     |
| Methanococcus vannielii        | ..... ..... ..... ..... ..... ..... ..... ..... ..... ..... ..... | -----MGEKITVSVIKADVGGIGGHTLPSGGLLDAVRRKVS---SSS-LLIDHYIGYCGDDSHVIMTHRRKGVDSSEIHK-LAWNTFEKA         |    |    |    |    |    |    |    |     |
| Methanococcus voltae           | ..... ..... ..... ..... ..... ..... ..... ..... ..... ..... ..... | -----MEEKITVSVIKADVGGIGGHTLPSGGLLDAVRRKVS---SSS-LLIDHYIGYCGDDSHVIMTHRRKGVDSSEIHK-LAWNTFEKA         |    |    |    |    |    |    |    |     |
| Methanoculleus marisnigri      | ..... ..... ..... ..... ..... ..... ..... ..... ..... ..... ..... | -----MVKTTVSVIKADIGSFGHSHRAHPKLEIAAQLRAE-RGKLLDSFVTVGDDLELVMTSHRGGVDSSEIHK-LAWNTFEKA               |    |    |    |    |    |    |    |     |
| Methanopyrus kandleri          | ..... ..... ..... ..... ..... ..... ..... ..... ..... ..... ..... | -----MVSVAEEKVTVSVIKADVGGFGVHSSHPDLELAKKAGILSG---SPLLIDFHVTVGDDINLILTHELGRNNGEITHG-LAWNTFEKA       |    |    |    |    |    |    |    |     |
| Methanoseta thermophila        | ..... ..... ..... ..... ..... ..... ..... ..... ..... ..... ..... | -----MSKVTVSVIKADVGGFGVHSSHPDLELAKKAGILSG---SPLLIDFHVTVGDDINLILTHELGRNNGEITHG-LAWNTFEKA            |    |    |    |    |    |    |    |     |
| Methanosphaera stadtmanae      | ..... ..... ..... ..... ..... ..... ..... ..... ..... ..... ..... | -----MKTITVSVIKADIGSFGHSHRAHPKLEIAAQLRAE-RGKLLDSFVTVGDDLELVMTSHRGGVDSSEIHK-LAWNTFEKA               |    |    |    |    |    |    |    |     |
| Methanothermobacter thermautot | ..... ..... ..... ..... ..... ..... ..... ..... ..... ..... ..... | -----MKTITVSVIKADIGSFGHSHRAHPKLEIAAQLRAE-RGKLLDSFVTVGDDLELVMTSHRGGVDSSEIHK-LAWNTFEKA               |    |    |    |    |    |    |    |     |
| Moorella thermoacetica         | ..... ..... ..... ..... ..... ..... ..... ..... ..... ..... ..... | -----MGERITVSVIKADIGGFGVHSSHPDLELAKKAGILSG---SPLLIDFHVTVGDDINLILTHELGRNNGEITHG-LAWNTFEKA           |    |    |    |    |    |    |    |     |
| Natronaerobius thermophilus    | ..... ..... ..... ..... ..... ..... ..... ..... ..... ..... ..... | -----MKITVTVSVIKADIGGFGVHSSHPDLELAKKAGILSG---SPLLIDFHVTVGDDINLILTHELGRNNGEITHG-LAWNTFEKA           |    |    |    |    |    |    |    |     |
| Nitrococcus mobilis            | ..... ..... ..... ..... ..... ..... ..... ..... ..... ..... ..... | -----MKITVTVSVIKADIGGFGVHSSHPDLELAKKAGILSG---SPLLIDFHVTVGDDINLILTHELGRNNGEITHG-LAWNTFEKA           |    |    |    |    |    |    |    |     |
| Nitrosopumilus maritimus       | ..... ..... ..... ..... ..... ..... ..... ..... ..... ..... ..... | -----MENKTTVSVIKADVGGFGVHSSHPDLELAKKAGILSG---SPLLIDFHVTVGDDINLILTHELGRNNGEITHG-LAWNTFEKA           |    |    |    |    |    |    |    |     |
| Pelotomaculum thermopropionicu | ..... ..... ..... ..... ..... ..... ..... ..... ..... ..... ..... | -----MGSKTVTVSVIKADIGGFGVHSSHPDLELAKKAGILSG---SPLLIDFHVTVGDDINLILTHELGRNNGEITHG-LAWNTFEKA          |    |    |    |    |    |    |    |     |
| Petrotoga mobilis              | ..... ..... ..... ..... ..... ..... ..... ..... ..... ..... ..... | -----MKSQVTVSVIKADVGGFGVHSSHPDLELAKKAGILSG---SPLLIDFHVTVGDDINLILTHELGRNNGEITHG-LAWNTFEKA           |    |    |    |    |    |    |    |     |
| Picrophilus torridus           | ..... ..... ..... ..... ..... ..... ..... ..... ..... ..... ..... | -----MKVTVSLIKADIGSFGHSHRAHPKLEIAAQLRAE-RGKLLDSFVTVGDDLELVMTSHRGGVDSSEIHK-LAWNTFEKA                |    |    |    |    |    |    |    |     |
| Pyrobaculum aerophilum         | ..... ..... ..... ..... ..... ..... ..... ..... ..... ..... ..... | -----MKTITVSVIKADIGSFGHSHRAHPKLEIAAQLRAE-RGKLLDSFVTVGDDLELVMTSHRGGVDSSEIHK-LAWNTFEKA               |    |    |    |    |    |    |    |     |
| Pyrobaculum arsenaticum        | ..... ..... ..... ..... ..... ..... ..... ..... ..... ..... ..... | -----MRLITLTKVTVSVIKADVGGFGVHSSHPDLELAKKAGILSG---SPLLIDFHVTVGDDINLILTHELGRNNGEITHG-LAWNTFEKA       |    |    |    |    |    |    |    |     |
| Pyrobaculum caldifontis        | ..... ..... ..... ..... ..... ..... ..... ..... ..... ..... ..... | -----MKVTVSVIKADVGGFGVHSSHPDLELAKKAGILSG---SPLLIDFHVTVGDDINLILTHELGRNNGEITHG-LAWNTFEKA             |    |    |    |    |    |    |    |     |
| Pyrobaculum islandicum         | ..... ..... ..... ..... ..... ..... ..... ..... ..... ..... ..... | -----MKVTVSVIKADVGGFGVHSSHPDLELAKKAGILSG---SPLLIDFHVTVGDDINLILTHELGRNNGEITHG-LAWNTFEKA             |    |    |    |    |    |    |    |     |
| Pyrococcus abyssi              | ..... ..... ..... ..... ..... ..... ..... ..... ..... ..... ..... | -----MAVGEKITVSVIKADVGGVPGHSHRAHPKLEIAAQLRAE-RGKLLDSFVTVGDDLELVMTSHRGGVDSSEIHK-LAWNTFEKA           |    |    |    |    |    |    |    |     |
| Pyrococcus furiosus            | ..... ..... ..... ..... ..... ..... ..... ..... ..... ..... ..... | -----MAVGEKITVSVIKADVGGVPGHSHRAHPKLEIAAQLRAE-RGKLLDSFVTVGDDLELVMTSHRGGVDSSEIHK-LAWNTFEKA           |    |    |    |    |    |    |    |     |
| Pyrococcus horikoshii          | ..... ..... ..... ..... ..... ..... ..... ..... ..... ..... ..... | MVINSINLWLFSEVAVMAGEKITVSVIKADVGGVPGHSHRAHPKLEIAAQLRAE-RGKLLDSFVTVGDDLELVMTSHRGGVDSSEIHK-LAWNTFEKA |    |    |    |    |    |    |    |     |
| Roseiflexus castenholzii       | ..... ..... ..... ..... ..... ..... ..... ..... ..... ..... ..... | -----MAAELTISCIKADVGGFGVHSSHPDLELAKKAGILSG---SPLLIDFHVTVGDDINLILTHELGRNNGEITHG-LAWNTFEKA           |    |    |    |    |    |    |    |     |
| Roseiflexus sp.                | ..... ..... ..... ..... ..... ..... ..... ..... ..... ..... ..... | -----MAAELTISCIKADVGGFGVHSSHPDLELAKKAGILSG---SPLLIDFHVTVGDDINLILTHELGRNNGEITHG-LAWNTFEKA           |    |    |    |    |    |    |    |     |
| Saccharopolyspora erythraea    | ..... ..... ..... ..... ..... ..... ..... ..... ..... ..... ..... | -----MVTLSIHKADTGGFGVHSSHPDLELAKKAGILSG---SPLLIDFHVTVGDDINLILTHELGRNNGEITHG-LAWNTFEKA              |    |    |    |    |    |    |    |     |
| Staphylothermus marinus        | ..... ..... ..... ..... ..... ..... ..... ..... ..... ..... ..... | -----MSEGEKITVSVIKADVGGVPGHSHRAHPKLEIAAQLRAE-RGKLLDSFVTVGDDLELVMTSHRGGVDSSEIHK-LAWNTFEKA           |    |    |    |    |    |    |    |     |
| Sulfolobus acidocaldarius      | ..... ..... ..... ..... ..... ..... ..... ..... ..... ..... ..... | -----MKTITVSVIKADIGSLAGHRRVHPDITLAAASRVLAERAKRKGVIKSFYVFNAGDDDLQIMTHRRKGVDSSEIHK-LAWNTFEKA         |    |    |    |    |    |    |    |     |
| Sulfolobus islandicus          | ..... ..... ..... ..... ..... ..... ..... ..... ..... ..... ..... | -----MKTITVSVIKADIGSLAGHRRVHPDITLAAASRVLAERAKRKGVIKSFYVFNAGDDDLQIMTHRRKGVDSSEIHK-LAWNTFEKA         |    |    |    |    |    |    |    |     |
| Sulfolobus solfataricus        | ..... ..... ..... ..... ..... ..... ..... ..... ..... ..... ..... | -----MKTITVSVIKADIGSLAGHRRVHPDITLAAASRVLAERAKRKGVIKSFYVFNAGDDDLQIMTHRRKGVDSSEIHK-LAWNTFEKA         |    |    |    |    |    |    |    |     |
| Sulfolobus tokodaii            | ..... ..... ..... ..... ..... ..... ..... ..... ..... ..... ..... | -----MKTITVSVIKADIGSLAGHRRVHPDITLAAASRVLAERAKRKGVIKSFYVFNAGDDDLQIMTHRRKGVDSSEIHK-LAWNTFEKA         |    |    |    |    |    |    |    |     |
| Syntrophus aciditrophicus      | ..... ..... ..... ..... ..... ..... ..... ..... ..... ..... ..... | -----MKTITVSVIKADVGGVPGHSHRAHPKLEIAAQLRAE-RGKLLDSFVTVGDDLELVMTSHRGGVDSSEIHK-LAWNTFEKA              |    |    |    |    |    |    |    |     |
| Thermoanaerobacter pseudethano | ..... ..... ..... ..... ..... ..... ..... ..... ..... ..... ..... | -----MS-KITVTVSVIKADVGGFGVHSSHPDLELAKKAGILSG---SPLLIDFHVTVGDDINLILTHELGRNNGEITHG-LAWNTFEKA         |    |    |    |    |    |    |    |     |
| Thermoanaerobacter tengcongens | ..... ..... ..... ..... ..... ..... ..... ..... ..... ..... ..... | -----MS-KITVTVSVIKADVGGFGVHSSHPDLELAKKAGILSG---SPLLIDFHVTVGDDINLILTHELGRNNGEITHG-LAWNTFEKA         |    |    |    |    |    |    |    |     |
| Thermococcus barophilus        | ..... ..... ..... ..... ..... ..... ..... ..... ..... ..... ..... | -----MAVGEKITVSVIKADIGGFGVHSSHPDLELAKKAGILSG---SPLLIDFHVTVGDDINLILTHELGRNNGEITHG-LAWNTFEKA         |    |    |    |    |    |    |    |     |
| Thermococcus gammatolerans     | ..... ..... ..... ..... ..... ..... ..... ..... ..... ..... ..... | -----MAVGEKITVSVIKADIGGFGVHSSHPDLELAKKAGILSG---SPLLIDFHVTVGDDINLILTHELGRNNGEITHG-LAWNTFEKA         |    |    |    |    |    |    |    |     |
| Thermococcus kodakarensis      | ..... ..... ..... ..... ..... ..... ..... ..... ..... ..... ..... | -----MAVGEKITVSVIKADIGGFGVHSSHPDLELAKKAGILSG---SPLLIDFHVTVGDDINLILTHELGRNNGEITHG-LAWNTFEKA         |    |    |    |    |    |    |    |     |
| Thermococcus onnurineus        | ..... ..... ..... ..... ..... ..... ..... ..... ..... ..... ..... | -----MAVGEKITVSVIKADIGGFGVHSSHPDLELAKKAGILSG---SPLLIDFHVTVGDDINLILTHELGRNNGEITHG-LAWNTFEKA         |    |    |    |    |    |    |    |     |
| Thermococcus sp.               | ..... ..... ..... ..... ..... ..... ..... ..... ..... ..... ..... | -----MAVGEKITVSVIKADIGGFGVHSSHPDLELAKKAGILSG---SPLLIDFHVTVGDDINLILTHELGRNNGEITHG-LAWNTFEKA         |    |    |    |    |    |    |    |     |
| Thermofilum pendens            | ..... ..... ..... ..... ..... ..... ..... ..... ..... ..... ..... | -----MKTITVSVIKADIGSFGHSHRAHPKLEIAAQLRAE-RGKLLDSFVTVGDDLELVMTSHRGGVDSSEIHK-LAWNTFEKA               |    |    |    |    |    |    |    |     |
| Thermoplasma acidophilum       | ..... ..... ..... ..... ..... ..... ..... ..... ..... ..... ..... | -----MKVTVSHIKADIGSLPGHSLVDEKVMERIEYEDHGKN-LVSDFRMAHVGDQAQITMVTHTKGVDSSEIHK-LAWNTFEKA              |    |    |    |    |    |    |    |     |
| Thermoplasma volcanium 1       | ..... ..... ..... ..... ..... ..... ..... ..... ..... ..... ..... | -----MKVTVSHIKADIGSLPGHSLVDEKVMERIEYEDHGKN-LVSDFRMAHVGDQAQITMVTHTKGVDSSEIHK-LAWNTFEKA              |    |    |    |    |    |    |    |     |
| Thermoplasma volcanium 2       | ..... ..... ..... ..... ..... ..... ..... ..... ..... ..... ..... | -----MKVTVSHIKADIGSLPGHSLVDEKVMERIEYEDHGKN-LVSDFRMAHVGDQAQITMVTHTKGVDSSEIHK-LAWNTFEKA              |    |    |    |    |    |    |    |     |
| Thermoproteus neutrophilus     | ..... ..... ..... ..... ..... ..... ..... ..... ..... ..... ..... | -----MRVTVSVIKADVGGFGVHSSHPDLELAKKAGILSG---SPLLIDFHVTVGDDINLILTHELGRNNGEITHG-LAWNTFEKA             |    |    |    |    |    |    |    |     |
| Thermoproteus tenax            | ..... ..... ..... ..... ..... ..... ..... ..... ..... ..... ..... | -----MKTITVSVIKADIGSFGHSHRAHPKLEIAAQLRAE-RGKLLDSFVTVGDDLELVMTSHRGGVDSSEIHK-LAWNTFEKA               |    |    |    |    |    |    |    |     |
| Thermus aquaticus              | ..... ..... ..... ..... ..... ..... ..... ..... ..... ..... ..... | -----MKTITVSVIKADIGSFGHSHRAHPKLEIAAQLRAE-RGKLLDSFVTVGDDLELVMTSHRGGVDSSEIHK-LAWNTFEKA               |    |    |    |    |    |    |    |     |
| Thermus thermophilus           | ..... ..... ..... ..... ..... ..... ..... ..... ..... ..... ..... | -----MKTITVSVIKADIGSFGHSHRAHPKLEIAAQLRAE-RGKLLDSFVTVGDDLELVMTSHRGGVDSSEIHK-LAWNTFEKA               |    |    |    |    |    |    |    |     |
| uncultured crenarchaeote       | ..... ..... ..... ..... ..... ..... ..... ..... ..... ..... ..... | -----MKTITVSVIKADVGGIGGHTLPSGGLLDAVRRKVS---SSS-LLIDHYIGYCGDDSHVIMTHRRKGVDSSEIHK-LAWNTFEKA          |    |    |    |    |    |    |    |     |
| uncultured marine crenarchaeot | ..... ..... ..... ..... ..... ..... ..... ..... ..... ..... ..... | -----MKTITVSVIKADVGGIGGHTLPSGGLLDAVRRKVS---SSS-LLIDHYIGYCGDDSHVIMTHRRKGVDSSEIHK-LAWNTFEKA          |    |    |    |    |    |    |    |     |
| uncultured marine crenarchaeot | ..... ..... ..... ..... ..... ..... ..... ..... ..... ..... ..... | -----MKTITVSVIKADVGGIGGHTLPSGGLLDAVRRKVS---SSS-LLIDHYIGYCGDDSHVIMTHRRKGVDSSEIHK-LAWNTFEKA          |    |    |    |    |    |    |    |     |
| uncultured marine crenarchaeot | ..... ..... ..... ..... ..... ..... ..... ..... ..... ..... ..... | -----MKTITVSVIKADVGGIGGHTLPSGGLLDAVRRKVS---SSS-LLIDHYIGYCGDDSHVIMTHRRKGVDSSEIHK-LAWNTFEKA          |    |    |    |    |    |    |    |     |
| Consensus                      | ..... ..... ..... ..... ..... ..... ..... ..... ..... ..... ..... | T S I K A D G G H D G D D H G H - A W                                                              |    |    |    |    |    |    |    |     |

|                                | 110               | 120           | 130       | 140              | 150             | 160            | 170          | 180        | 190      | 200            |
|--------------------------------|-------------------|---------------|-----------|------------------|-----------------|----------------|--------------|------------|----------|----------------|
| Aciduliprofundum boonei 1      | TA-VAKELKLYGAGD   | LLKDAFSGNIRG  | MGPGAEME  | ITR-----         | KSEPIVAFMMDKTE  | PGAFNLPYIRI    | FADPFNTA     | GLVIDP     | SMHGGFKF | FEVMDIM        |
| Aciduliprofundum boonei 2      | TA-VAKELKLYGAGD   | LLKDAFSGNIRG  | MGPGAEME  | ITR-----         | KSEPIVAFMMDKTE  | PGAFNLPYIRI    | FADPFNTA     | GLVIDP     | SMHGGFKF | FEVMDIM        |
| Aeropyrum pernix               | TK-VAKDLGLYAGQD   | LLSDAFSGNIRG  | LGPGVAEME | FVER-----        | PSEPIVVFMAADKTE | PGAFNLPYKIF    | FADPFNTA     | GLVIDP     | RLHGGFIF | FEVLDVF        |
| Aquifex aeolicus               | TE-VAKKLLYAGQD    | LLTDFSGNVRG   | MGPGVAEME | FEEER-----       | PSEPIVVFADKTE   | SPSAWNLPLY     | EMFADPFNTA   | GLVIDP     | KMHGGFTE | FEVLDVY        |
| Archaeoglobus fulgidus         | AG-IAKELKLYGAGD   | LLKDAFSGNVRG  | LGPGVAEME | FEEER-----       | KAEPIVAFMMDKTE  | PGAFNLPYIRI    | FADPFNTA     | GLVIDP     | SMHGGFKF | FEVMDIM        |
| Bradyrhizobium japonicum       | TS-VAKTSGLYAGQD   | LLADAFSGNIRG  | AGPVAEL   | SFDHS--LSGARPAES | FMVFAADKCG      | PAYNLPLY       | LAFADPMY     | CAGLMLP    | PMIK--G  | FRFHVIMD       |
| Caldivirga maquilingensis      | TENYAKFKLYGAGD    | LLKDAFSGNVRG  | LGPGVAEME | FEEER-----       | PSEPLIFAADKTE   | PGAYNLPMY      | KIFADPFNTA   | GLVIDP     | QMHGGFR  | FEIDVY         |
| Candidatus Desulforudis audax  | TE-VAKKLLYAGQD    | LLGDAFSGNIRG  | LGPGVAE   | IEVVER-----      | KSEPIVFLMADKTE  | PGAWNLPLY      | RIFADPFNTA   | GLVIDP     | NMHGGFNF | FEVRLDI        |
| Candidatus Korarchaeum cryptof | AD-AAKELGLYAGQD   | LLKDAFSGNIRG  | MGPGVAEME | FEEER-----       | PSPDIVVFMAADKTE | PGAFNLPYKIF    | FADPFNTA     | GLVIDP     | DKLHSGF  | IFFEIMDVI      |
| Candidatus Methanoregula boone | TK-VAKRFLKLYGAGQD | LLAEAFD       | IRELGP    | VAEME            | FEEER-----      | ESDPVLFMAADKTE | PGAWNFYLY    | KIFADPFNTA | GLVIDP   | SLGGFVFEVHD    |
| Carboxydibrachium pacificum    | TE-RARELKLYGAGQD  | LLKDAFSGNIRG  | MGPGVAEME | FEEER-----       | KSEPVVIFIAADKTE | PGAWNLPLY      | KMFADPFNTA   | GLVIDP     | SMHGGFKF | FEVMDIM        |
| Carboxydotherrna hydrogenoform | TE-VAKKLLYAGQD    | LLADAFSGNVRG  | LGPGVAEME | FEEER-----       | TSEPIVFAADKTE   | PGAWNLPLY      | KMFADPFNTA   | GLVIDP     | KMHGGFKF | FEVLDLL        |
| Cenarchaeum symbiosum          | TR-VAKEEGLYAGQD   | LLSDAFSGNVRG  | MGPGVAE   | LEFEEER-----     | ANEAPVFAADKTE   | PGAFNYPYR      | FMVFDLS      | NSLNTGL    | IVNKS    | LAEQVVINIMDVS  |
| Coxiella burnetii              | TE-VAKEQGNLYAGQD  | LLVADAFSGNVRG | AGPVAE    | IEFTLNPKSNYRPAES | FMIFAGDKC       | PAGFNLPLY      | LVFC         | CDPMHNG    | GILLNPKI | HLGWFTVIDMD    |
| Dehalococcoides ethenogenes    | TE-VAKELKLYGAGQD  | LLCDAFSGNVRG  | MGPGVAEME | LEER-----        | PSEPIIFMAADKTE  | SSGAWNLPLY     | KMFADPFNTA   | GLVIDP     | ENMHGGF  | SFSEVHDVK      |
| Desulfurococcus kamchatkensis  | TE-VAKELKLYGAGQD  | LLCDAFSGNVRG  | MGPGVAEME | LEER-----        | PSEPIIFMAADKTE  | SSGAWNLPLY     | KMFADPFNTA   | GLVIDP     | ENMHGGF  | SFSEVHDVK      |
| Hydrogenivirga sp.             | TK-VAKELKLYGAGQD  | LLSEAFSGNVRG  | LGPGVAE   | LEMEER-----      | EAEPIVTFHADKTE  | PGAFNLPYR      | VFADPFNTA    | GLVIDP     | KMHGGF   | VFVLDVY        |
| Hydrogenobaculum sp.           | TE-VAKKLLYAGQD    | LLTDFSGNIRG   | LGPGVAEME | FEEER-----       | PSEPIVVFADKTE   | SPSAWNLPLY     | EMFADPFNTA   | GLVIDP     | KMHGGF   | VFVLDVY        |
| Hyperthermus butylicus         | AE-VAKELGLYAGQD   | LLSDAFSGNIRG  | MGPGVAEME | FEEER-----       | PSEPIVVFMAADKTE | PGAFNLPYKIF    | FADPFNTA     | GLVIDP     | DKLHSGF  | IFFEIMDVI      |
| Ignicoccus hospitalis          | AE-VAKELGLYAGQD   | LLSDAFSGNVRG  | LGPGVAE   | MEIEER-----      | PSEPIVFAADKTE   | PGAFNLPYKIF    | FADPFNTA     | GLVIDP     | RLHGGF   | VFVLDVY        |
| Metallosphaera sedula          | TK-VSKELGLYAGQD   | LLSDAFSGNIRG  | MGPGVAE   | IELEIDER-----    | PSEPIAFMAADKTE  | PGAFNLPYKMF    | FADPFNTA     | GLVIDP     | SMHGGFKF | FEVMDIM        |
| Methanobrevibacter smithii     | TE-RARELKLYGAGQD  | LLSDAFSGNIRG  | MGPGVAE   | MEFKER-----      | PSPDVLVYCCDKTE  | PGAFNLPYKMF    | FADPFNTA     | GLVIDP     | SLHGGF   | VFVLDVY        |
| Methanocaldococcus jannaschii  | TK-VAKELKLYGAGQD  | LLADAFSGNVRG  | MGPGVAE   | MEFVER-----      | KSEPIVVFCCDKTE  | PATFNPLY       | KMFADPFNTA   | GLVIDP     | DSMISG   | FKFVEVHDVY     |
| Methanococcus aeolicus         | TE-VAKELKLYGAGQD  | LLSEGFSGNVRG  | MGPGVAE   | MEFVER-----      | PSEPIVVFCCDKTE  | PAAFNLPLY      | RMFADPFNTA   | GLVIDP     | DKKMQG   | GFDFVLDIY      |
| Methanococcus maripaludis      | TE-VAKELKLYGAGQD  | LLSNFSGNVRG   | LGPGVAE   | MEFVER-----      | PSEPIVVFCCDKTE  | PAAFNLPLY      | RMFADPFNTA   | GLVIDP     | DSMTS    | GFRYEILDFV     |
| Methanococcus vannielii        | TS-VAKELKLYGAGQD  | LLSNFSGNIRG   | LGPGVAE   | MEFVER-----      | PSEPIVVFCCDKTE  | PAAFNLPLY      | RYKMFADPFNTA | GLVIDP     | SMASG    | FVFEVLDVM      |
| Methanococcus voltae           | TD-VAKELKLYGAGQD  | LLSDAFSGNVRG  | LGPGVAE   | MEFVER-----      | RSEPIVVFCCDKTE  | PAAFNLPLY      | RYKMFADPFNTA | GLVIDP     | DSMTE    | GFKFVEVMDII    |
| Methanoculleus marisnigri      | AG-LAKEMKLYGAGQD  | LLGDAFSGNVRG  | MGPGVAEME | FEEER-----       | GSDPILVFMADKTE  | PGAWNFYLY      | KIFADPFNTA   | GLVIDP     | SLHGGF   | VFVLDVY        |
| Methanopyrus kandleri          | TK-VAEDLKLYGAGQD  | LLSDAFSGNVRG  | LGPGVAE   | MEFVER-----      | PSEPIVVFCCDKTE  | PGAFNLPYR      | IFADPFNTA    | GLVIDP     | SMHGGF   | VFVLDVY        |
| Methanoseta thermophila        | TA-EAKSLKLYGAGQD  | LLCDAFSGNIRG  | MGPGVAE   | MEQFTR-----      | DAEPIVAFMMDKTE  | PGAFNLPYR      | IFADPFNTA    | GLVIDP     | SMHGGF   | VFVLDVY        |
| Methanosphaera stadtmanae      | AE-VAKGLKLYGAGQD  | LLSDAFSGNIRG  | MGPGVAE   | MEFKER-----      | GSDPVFAACDKTE   | PGAFNLPYR      | IFADPFNTA    | GLVIDP     | SLHGGF   | VFVLDVY        |
| Methanothermobacter thermautot | TD-VARGLKLYGAGQD  | LLSDAFSGNIRG  | MGPGVAE   | MEFKER-----      | PSPDVIIFCCDKTE  | PGAFNLPYR      | IFADPFNTA    | GLVIDP     | SLHGGF   | VFVLDVY        |
| Moorella thermoacetica         | TE-VAKELKLYGAGQD  | LLSDAFSGNVRG  | MGPGVAE   | MEFEEER-----     | KSEPIVFAADKTE   | PGAWNLPLY      | KMFADPFNTA   | GLVIDP     | SLHGGF   | VFVLDVY        |
| Natronaerobius thermophilus    | TA-TAKKORLYGAGQD  | LLSDAFSGNIRG  | LGPGVAE   | MEIEER-----      | ENEPVLFVADKTE   | PGAYNLPLY      | LSFC         | CDPMHNG    | GLLSPKI  | GGDFFTVMDVS    |
| Nitrococcus mobilis            | TE-VAQAQGLYAGQD   | LLVQAFSA      | ANVRG     | MGPPVAE          | MEIDER-----     | PNEPFLFFAADKTE | PGAYNLPLY    | LAFDPMYNS  | GLILSP   | TNMQGFRFVIMDVE |
| Nitrosopumilus maritimus       | TQ-VAKEEGLYAGQD   | LLKDAFSGNVRG  | MGPGVAE   | MEFEEER-----     | PNEAPVFAADKTE   | PGAFNYPYR      | FMVFDLS      | NSLNTGL    | IVNKN    | LADGVKINIMDVE  |
| Pelotomaculum thermopropionicu | TK-IAKMKLYGAGQD   | LLADAFSGNIRG  | LGPGVAE   | MEFEEER-----     | NSEPIVVFMAADKTE | PGAWNLPLY      | KMFADPFNTA   | GLVIDP     | SMHGGF   | VFVLDVY        |
| Petrophila mobilis             | TK-IAKELKLYGAGQD  | LLSDAFSGNIRG  | MGPGVAE   | MEFEEER-----     | GSETLVAFMMDKTE  | PGSFNYPYR      | KIFADPFNTA   | GLVIDP     | LLIDG    | GFVFEVMDII     |
| Picrophilus torridus           | TK-IAKELKLYGAGQD  | LLSDAFSGNVRG  | LGPGVAE   | MEIEER-----      | KSEPIVVFMAADKTE | PGAFNLPYKMF    | FADPFNTA     | GLVIDP     | SMHGGF   | VFVLDVY        |
| Pyrobaculum aerophilum         | TEQVAKKLYGAGQD    | LLKDAFSGNVRG  | MGPGVAE   | MEFEEER-----     | PSEPIVVFMAADKTE | PGAFNLPYKMF    | FADPFNTA     | GLVIDP     | SMHGGF   | VFVLDVY        |
| Pyrobaculum arsenaticum        | TEQVIAKFKLYGAGQD  | LLKDAFSGNVRG  | MGPGVAE   | MEFEEER-----     | PSPDILVFAADKTE  | PGAFNLPYKMF    | FADPFNTA     | GLVIDP     | SMHGGF   | VFVLDVY        |
| Pyrobaculum calidifontis       | TEQVAKKLYGAGQD    | LLKDAFSGNIRG  | LGPGVAE   | MEFEEER-----     | PSEPLIFAADKTE   | PGAFNLPYKMF    | FADPFNTA     | GLVIDP     | SMHGGF   | VFVLDVY        |
| Pyrobaculum islandicum         | TEQVAKKLYGAGQD    | LLKDAFSGNIRG  | LGPGVAE   | MEIEER-----      | PSEPIVVFMAADKTE | PGAFNLPYKMF    | FADPFNTA     | GLVIDP     | SMHGGF   | VFVLDVY        |
| Pyrococcus abyssi              | TE-VAKELALYAGQD   | LLKDAFSGNVRG  | MGPGVAE   | MEITLR-----      | KSEPIVTFHLDKTE  | PGAFNLPYR      | IFADPFNTA    | GLVIDP     | KMHGGF   | VFVLDVY        |
| Pyrococcus furiosus            | TE-VAKELGLYAGQD   | LLKDAFSGNVRG  | LGPGVAE   | MEITLR-----      | KSEPIVTFHLDKTE  | PGAFNLPYR      | IFADPFNTA    | GLVIDP     | KMHGGF   | VFVLDVY        |
| Pyrococcus horikoshii          | TE-VAKELGLYAGQD   | LLKDAFSGNVRG  | LGPGVAE   | MEITLR-----      | KSEPIVTFHLDKTE  | PGAFNLPYR      | IFADPFNTA    | GLVIDP     | KMHGGF   | VFVLDVY        |
| Roseiflexus castenholzii       | TR-VAKELKLYGAGQD  | LLKDAFSGNVRG  | MGPGVAE   | MEITLR-----      | LSEPIVVFADKTE   | SAGAWNLPLY     | RMFADPFNTA   | GLVIDP     | SAMHGGF  | VFVLDVY        |
| Roseiflexus sp.                | TR-VAKELKLYGAGQD  | LLKDAFSGNVRG  | MGPGVAE   | MEITLR-----      | PSEPIVVFADKTE   | SAGAWNLPLY     | RMFADPFNTA   | GLVIDP     | SAMHGGF  | VFVLDVY        |
| Saccharopolyspora erythraea    | TG-IAKRLGLYAGQD   | LLSDAFSGNIRG  | MGPGVAE   | LEFEEER-----     | PSEPVVFLADKTE   | PGAWNLPLY      | KIFADPFNTA   | GLVIDP     | AKMHAG   | FRFVEVLDY      |
| Staphylothermus marinus        | AK-VAKELKLYGAGQD  | LLSDAFSGNVRG  | LGPGVAE   | MEIEER-----      | KATVITFFHADKTE  | PGAFNLPYR      | IFADPFNTA    | GLVIDP     | SMHGGF   | VFVLDVY        |
| Sulfolobus acidocaldarius      | AK-VAKELGLYAGQD   | LLSDAFSGNVRG  | LGPGVAE   | IEVEER-----      | PSEPIAFMAADKTE  | PGAFNLPYKMF    | FADPFNTA     | GLVIDP     | TMHGGF   | VFVLDVY        |
| Sulfolobus islandicus          | AK-VAKDLGLYAGQD   | LLSDAFSGNVRG  | MGPGVAE   | IEVEER-----      | PAEPVVFMAADKTE  | PGAYNLPLY      | KIFADPFNTA   | GLVIDP     | TMHGGF   | VFVLDVY        |
| Sulfolobus solfataricus        | AK-IAKDLGLYAGQD   | LLSDAFSGNVRG  | MGPGVAE   | IEVEER-----      | PAEPVVFMAADKTE  | PGAYNLPLY      | KIFADPFNTA   | GLVIDP     | TMHGGF   | VFVLDVY        |
| Sulfolobus tokodaii            | AK-VAKDLGLYAGQD   | LLSDAFSGNVRG  | LGPGVAE   | IEIEER-----      | ASEPIAFMAADKTE  | PGAYNLPLY      | KMFADPFNTA   | GLVIDP     | TMHGGF   | VFVLDVY        |
| Syntrophus aciditrophicus      | TK-VAKEQGLYAGQD   | LLKDAFSGNVRG  | MGPGVAE   | MEFEEER-----     | PNEPFLFFAADKTE  | PGAYNLPLY      | LAFDPMYNS    | GLILSP     | TNMQGFRF | VIMDVE         |
| Thermoanaerobacter pseudethano | GE-KAKELKLYGAGQD  | LLKDAFSGNIRG  | LGPGVAE   | MEIEER-----      | KSEPIVIFMAADKTE | PGAWNLPLY      | KMFADPFNTA   | GLVIDP     | NMHGGF   | VFVLDVY        |
| Thermoanaerobacter tengcongens | TE-RARELKLYGAGQD  | LLKDAFSGNIRG  | MGPGVAE   | MEFEEER-----     | KSEPVVIFIAADKTE | PGAWNLPLY      | KMFADPFNTA   | GLVIDP     | SMHGGF   | VFVLDVY        |
| Thermococcus barophilus        | TK-TAKELGLYAGQD   | LLKDAFSGNIRG  | MGPGVAE   | MEITLR-----      | KSEPIVTFHMDKTE  | PGAFNLPYR      | IFADPFNTA    | GLVIDP     | NMHGGF   | VFVLDVY        |
| Thermococcus gammatolerans     | TK-VAKELGLYAGQD   | LLKDAFSGNVRG  | MGPGVAE   | MEITLR-----      | KSEPVVTFHMDKTE  | PGAFNLPYR      | IFADPFNTA    | GLVIDP     | NMHGGF   | VFVLDVY        |
| Thermococcus kodakarensis      | TK-VAKELGLYAGQD   | LLKDAFSGNVRG  | MGPGVAE   | MEITLR-----      | KSEPVVTFHMDKTE  | PGAFNLPYR      | IFADPFNTA    | GLVIDP     | NMHGGF   | VFVLDVY        |
| Thermococcus onnurineus        | TE-IAKELGLYAGQD   | LLKDAFSGNIRG  | MGPGVAE   | MEITLR-----      | KSEPIVTFHMDKTE  | PGAFNLPYR      | IFADPFNTA    | GLVIDP     | NMHGGF   | VFVLDVY        |
| Thermococcus sp.               | TK-VAKELGLYAGQD   | LLKDAFSGNVRG  | MGPGVAE   | MEITLR-----      | KSEPIVTFHMDKTE  | PGAFNLPYR      | IFADPFNTA    | GLVIDP     | NMHGGF   | VFVLDVY        |
| Thermofilum pendens            | TEKVSPLKLYGAGQD   | LLKDAFSGNIRG  | MGPGVAE   | MEFEEER-----     | RSEPIVLFVADKTE  | PGAWNFYLY      | KIFADPFNTA   | GLVIDP     | PAMHGGF  | VFVLDVY        |
| Thermoplasma acidophilum       | TE-VAKLLGLYAGQD   | LLKDAFSGNIRG  | MGPGVAE   | MEITLR-----      | PSEPIVYVMDKTE   | PGAFNLPYR      | IFADPFNTA    | GLVIDP     | TMHGGF   | VFVLDVY        |
| Thermoplasma volcanium 1       | TE-VAKLLGLYAGQD   | LLKDAFSGNIRG  | MGPGVAE   | MEITLR-----      | PSEPIVYVMDKTE   | PGAFNLPYR      | IFADPFNTA    | GLVIDP     | TMHGGF   | VFVLDVY        |
| Thermoplasma volcanium 2       | TE-VAKLLGLYAGQD   | LLKDAFSGNIRG  | MGPGVAE   | MEITLR-----      | PSEPIVYVMDKTE   | PGAFNLPYR      | IFADPFNTA    | GLVIDP     | TMHGGF   | VFVLDVY        |
| Thermoproteus neutrophilus     | TDQIAKRFKLYGAGQD  | LLKDAFSGNIRG  | MGPGVAE   | MEFEEER-----     | PSEPIIAFAADKTE  | PGAFNLPYKMF    | FADPFNTA     | GLVIDP     | SMHGGF   | VFVLDVY        |
| Thermoproteus tenax            | TEKIAKFKLYGAGQD   | LLKDAFSGNIRG  | MGPGVAE   | MEIEER-----      | PSEPIVTFADKTE   | PGAFNLPYKMF    | FADPFNTA     | GLVIDP     | PAMHGGF  | VFVLDVY        |
| Thermus aquaticus              | TE-VAKREGLYAGQD   | LLKDAFTGNL    | RGPGVAE   | MEFAER-----      | PSEPFMVLAADKTE  | PGAFNLPYLA     | FADPMYSS     | GLLLS      | PELRG    | GFRRIMDLA      |
| Thermus thermophilus           | TE-VAKREGLYAGQD   | LLKDAFTGNL    | RGPGVAE   | MEFAER-----      | PSEPFMVLAADKTE  | PGAFNLPYLA     | FADPMYSS     | GLLLS      | PELRG    | GFRRIMDLA      |
| uncultured crenarchaeote       | TQ-VAKDEGLYAGQD   | LLKDAFSGNVRG  | MGPGVAE   | LEFEEER-----     | PNEAPVFAADKTE   | PGAFNYPYR      | FMVFDLS      | NSLNTGL    | IVNKS    | LAEQVVINIMDVE  |
| uncultured marine crenarchaeot | TK-VAKEEGLYAGQD   | LLKDAFSGNIRG  | MGPGVAE   | MEFEEER-----     | PNEVTFVFAADKTE  | PGAFNYPYR      | IFVFDLS      | NSLNTGL    | IVNKS    | LAEQVVINIMDVE  |
| uncultured marine crenarchaeot | TK-VAKEEGLYAGQD   | LLKDAFSGNIRG  | MGPGVAE   | MEFEEER-----     | PNEVTFVFAADKTE  | PGAFNYPYR      | IFVFDLS      | NSLNTGL    | IVNKS    | LAEQVVINIMDVE  |
| uncultured marine crenarchaeot | TK-VAKEEGLYAGQD   | LLKDAFSGNIRG  | MGPGVAE   | MEFEEER-----     | PNEVTFVFAADKTE  | PGAFNYPYR      | IFVFDLS      | NSLNTGL    | IVNKS    | LAEQVVINIMDVE  |

A LY AGQDLL F SGN I R G M G P G V A E M E I T R ----- D K T A N F D G L G D



|                                 | 210  | 220 | 230       | 240 | 250       | 260     | 270        | 280     | 290     | 300     |         |         |         |         |         |         |         |         |        |       |       |    |   |     |     |    |    |     |       |    |    |    |   |   |   |    |    |   |   |   |   |   |    |    |       |       |       |       |       |       |   |   |   |   |   |   |   |   |   |   |   |
|---------------------------------|------|-----|-----------|-----|-----------|---------|------------|---------|---------|---------|---------|---------|---------|---------|---------|---------|---------|---------|--------|-------|-------|----|---|-----|-----|----|----|-----|-------|----|----|----|---|---|---|----|----|---|---|---|---|---|----|----|-------|-------|-------|-------|-------|-------|---|---|---|---|---|---|---|---|---|---|---|
| Aciduliprofundum boonei 1       | EHKK | --- | VIMHSPKEM | YD  | LLALIGAKS | RYVIKRV | YATESNPKVK | GEVVAVV | STEKLYI | QIAGEY  | SKDDF   | VALVRAQ | SGCPALG | EVLEPF  | FAPP    | HLVSG   |         |         |        |       |       |    |   |     |     |    |    |     |       |    |    |    |   |   |   |    |    |   |   |   |   |   |    |    |       |       |       |       |       |       |   |   |   |   |   |   |   |   |   |   |   |
| Aciduliprofundum boonei 2       | EHKK | --- | VIMHSPKEM | YD  | LLALIGAKS | RYVIKRV | YATESNPKVK | GEVVAVV | STEKLYI | QIAGEY  | SKDDF   | VALVRAQ | SGCPALG | EVLEPF  | FAPP    | HLVSG   |         |         |        |       |       |    |   |     |     |    |    |     |       |    |    |    |   |   |   |    |    |   |   |   |   |   |    |    |       |       |       |       |       |       |   |   |   |   |   |   |   |   |   |   |   |
| Aeropyrum pernix                | EGKA | --- | VELRAPPEI | YD  | LLALIGT   | PSRYV   | VKRVYRKS   | ---     | DREIAAV | VSSERL  | SLIAGRY | YVSKDDF | VMIVRAQ | SGFFAVG | EVLEPF  | FAPP    | HLVAG   |         |        |       |       |    |   |     |     |    |    |     |       |    |    |    |   |   |   |    |    |   |   |   |   |   |    |    |       |       |       |       |       |       |   |   |   |   |   |   |   |   |   |   |   |
| Aquifex aeolicus                | TGKA | --- | VKLNTPAE  | YD  | LLALIGS   | VKRYV   | VVKNVYRD   | ---     | GEIAA   | TASTQ   | RSLIAGQ | YVYKDDF | VMIVRAQ | SGFFAVG | EVLEPF  | FAPP    | HLVAG   |         |        |       |       |    |   |     |     |    |    |     |       |    |    |    |   |   |   |    |    |   |   |   |   |   |    |    |       |       |       |       |       |       |   |   |   |   |   |   |   |   |   |   |   |
| Archaeoglobus fulgidus          | ESKR | --- | VFMRTPEE  | YD  | LLALIGG   | KSRFV   | IKRVYK     | KEGKLP  | PADEP   | VAVISTE | KLYEVAG | YVYKDDF | VMIVRAQ | SGFFAVG | EVLEPF  | FAPP    | HLVSG   |         |        |       |       |    |   |     |     |    |    |     |       |    |    |    |   |   |   |    |    |   |   |   |   |   |    |    |       |       |       |       |       |       |   |   |   |   |   |   |   |   |   |   |   |
| Bradyrhizobium japonicum        | NTAG | --- | DSLLEL    | PA  | DDSYH     | IAALLR  | DNRF       | GIDRI   | ISRTHG  | ---     | EVVVA   | VSAQR   | LHAIAG  | KYVYK   | SKDDF   | VMIVRNQ | GIFPAP  | BEIIS   | PF     | AKA   | HFVGG |    |   |     |     |    |    |     |       |    |    |    |   |   |   |    |    |   |   |   |   |   |    |    |       |       |       |       |       |       |   |   |   |   |   |   |   |   |   |   |   |
| Caldivirga maquilingensis       | EGRV | --- | YLLDAP    | EH  | YITL      | GLIGT   | PGRYI      | IRRVYR  | RS      | ---     | DLTQA   | AVVSV   | ERLNL   | IAGRY   | YVSKDDF | VMIVRAQ | HGLPA   | VGEVLE  | EAF    | FAPP  | HLVGG |    |   |     |     |    |    |     |       |    |    |    |   |   |   |    |    |   |   |   |   |   |    |    |       |       |       |       |       |       |   |   |   |   |   |   |   |   |   |   |   |
| Candidatus Desulfurudis audax   | AHKK | --- | IIFSAP    | EDI | YD        | MLVFI   | GAPGR      | YAIKRV  | FHKAN   | ---     | GQIAA   | SSSTQ   | RNLMA   | GRYV    | YVSKDDF | VMIVRAQ | SGFFAVG | EVLEPF  | FAPP   | HLVSG |       |    |   |     |     |    |    |     |       |    |    |    |   |   |   |    |    |   |   |   |   |   |    |    |       |       |       |       |       |       |   |   |   |   |   |   |   |   |   |   |   |
| Candidatus Korarchaeum cryptof  | ESKV | --- | VELSSP    | ED  | YD        | LLALIG  | TSPRY      | VIKRVYR | KV      | ---     | DREIAA  | SISTT   | RSLIAG  | RYVYK   | SKDDF   | VMIVRAQ | AGFPAL  | G       | EVLEPF | FAPP  | FLVAG |    |   |     |     |    |    |     |       |    |    |    |   |   |   |    |    |   |   |   |   |   |    |    |       |       |       |       |       |       |   |   |   |   |   |   |   |   |   |   |   |
| Candidatus Methanoregula boone  | AKRM | --- | ITFSCP    | EE  | YD        | LLALIG  | SSSR       | YV      | IKRVYK  | RD      | ---     | GTIVAS  | TSTQ    | RNLTA   | GRYVYK  | SKDDF   | VMIVRAQ | SGFFAVG | EVLEPF | FAPP  | HLVAG |    |   |     |     |    |    |     |       |    |    |    |   |   |   |    |    |   |   |   |   |   |    |    |       |       |       |       |       |       |   |   |   |   |   |   |   |   |   |   |   |
| Carboxydibrachium pacificum     | EGKK | --- | IVFNTPE   | E   | YD        | LLALIG  | TSPRY      | VIKRVYR | TKN     | ---     | NEIAA   | VSTQ    | RNLMA   | GRYVYK  | SKDDF   | VMIVRCQ | GNLPA   | VGEVLE  | EAF    | FAPP  | HLVFG |    |   |     |     |    |    |     |       |    |    |    |   |   |   |    |    |   |   |   |   |   |    |    |       |       |       |       |       |       |   |   |   |   |   |   |   |   |   |   |   |
| Carboxydotherrmus hydrogenoform | ENKK | --- | IIFNTPE   | E   | YD        | LLALIG  | TSPRY      | VIKRVYR | TKA     | ---     | GEIAA   | TSTQ    | RNLMA   | GRYVYK  | SKDDF   | VMIVRCQ | GNLPA   | VGEVLE  | EAF    | FAPP  | HLVSG |    |   |     |     |    |    |     |       |    |    |    |   |   |   |    |    |   |   |   |   |   |    |    |       |       |       |       |       |       |   |   |   |   |   |   |   |   |   |   |   |
| Cenarchaeum symbiosum           | --KA | --- | RTARLV    | W   | EDK       | PIE     | AALMY      | PGRV    | VSVET   | RDG     | ---     | EPIA    | SAS     | TRL     | HNIAG   | YVYK    | SKDDF   | HICLV   | R      | TQ    | K     | NP | F | ATE | EAG | S  | F  | SNP | HYVAG |    |    |    |   |   |   |    |    |   |   |   |   |   |    |    |       |       |       |       |       |       |   |   |   |   |   |   |   |   |   |   |   |
| Coxiella burnetii               | YKGE | --- | EDDR      | I   | Q         | LSV     | PER        | SWD     | V       | ALLQ    | N       | DRY     | AV      | S       | IR      | S       | RYK     | PE      | ---    | EQV   | V     | S  | A | T   | R   | L  | H  | N   | I     | A  | G  | Y  | V | Y | K | SK | DD | F | H | A | I | R | Q  | S  | G     | F     | P     | A     | E     | I     | E | P | A | S | T | I | N | Q | I | S | G |
| Dehalococcoides ethenogenes     | ESKG | --- | ISFNTPE   | E   | YD        | LLALIG  | TSPRY      | VIKRVYR | TKN     | ---     | GEIAA   | VSTQ    | RNLMA   | GRYVYK  | SKDDF   | VMIVRCQ | GNLPA   | VGEVLE  | EAF    | FAPP  | HLVAG |    |   |     |     |    |    |     |       |    |    |    |   |   |   |    |    |   |   |   |   |   |    |    |       |       |       |       |       |       |   |   |   |   |   |   |   |   |   |   |   |
| Dehalococcoides sp.             | ESKG | --- | ITFNTPE   | E   | YD        | LLALIG  | TSPRY      | VIKRVYR | TKN     | ---     | GEIAA   | VSTQ    | RNLMA   | GRYVYK  | SKDDF   | VMIVRCQ | GNLPA   | VGEVLE  | EAF    | FAPP  | HLVAG |    |   |     |     |    |    |     |       |    |    |    |   |   |   |    |    |   |   |   |   |   |    |    |       |       |       |       |       |       |   |   |   |   |   |   |   |   |   |   |   |
| Desulfurococcus kamchatkensis   | EGRS | --- | VLLKSP    | EE  | YD        | LLALIG  | TSPRY      | VIKRVYR | TKN     | ---     | DNLLA   | AVVSV   | ERLNL   | IAGRY   | YVSKDDF | VMIVRAQ | HGLPA   | VGEVLE  | EAF    | FAPP  | HLVAG |    |   |     |     |    |    |     |       |    |    |    |   |   |   |    |    |   |   |   |   |   |    |    |       |       |       |       |       |       |   |   |   |   |   |   |   |   |   |   |   |
| Hydrogenivirga sp.              | TGKA | --- | VRLSTP    | AE  | YD        | LLALIG  | TSPRY      | VIKRVYR | TKN     | ---     | GEIAA   | TSTQ    | RNLMA   | GRYVYK  | SKDDF   | VMIVRSQ | SGFFAVG | EVLEPF  | FAPP   | HLVAG |       |    |   |     |     |    |    |     |       |    |    |    |   |   |   |    |    |   |   |   |   |   |    |    |       |       |       |       |       |       |   |   |   |   |   |   |   |   |   |   |   |
| Methanococcus vannielii         | TGKA | --- | VKLNTP    | AE  | YD        | LLALIG  | TSPRY      | VIKRVYR | TKN     | ---     | GEIAA   | VSTQ    | RNLMA   | GRYVYK  | SKDDF   | VMIVRCQ | GNLPA   | VGEVLE  | EAF    | FAPP  | HLVAG |    |   |     |     |    |    |     |       |    |    |    |   |   |   |    |    |   |   |   |   |   |    |    |       |       |       |       |       |       |   |   |   |   |   |   |   |   |   |   |   |
| Methanococcus voltae            | EGKY | --- | VVLNAP    | EE  | YD        | LLALIG  | TSPRY      | VIKRVYR | TKN     | ---     | DNIEA   | AVVSV   | ERLNL   | IAGRY   | YVSKDDF | VMIVRAQ | SGFFAVG | EVLEPF  | FAPP   | HLVAG |       |    |   |     |     |    |    |     |       |    |    |    |   |   |   |    |    |   |   |   |   |   |    |    |       |       |       |       |       |       |   |   |   |   |   |   |   |   |   |   |   |
| Methanococcus marisnigri        | EDKG | --- | VHLNTP    | AE  | YD        | LLALIG  | TSPRY      | VIKRVYR | TKN     | ---     | DGKIA   | AVVSV   | ERLNL   | IAGRY   | YVSKDDF | VMIVRAQ | SGFFAVG | EVLEPF  | FAPP   | HLVAG |       |    |   |     |     |    |    |     |       |    |    |    |   |   |   |    |    |   |   |   |   |   |    |    |       |       |       |       |       |       |   |   |   |   |   |   |   |   |   |   |   |
| Methanopyrus kandleri           | EGGS | --- | VVLNAP    | EE  | YD        | LLALIG  | TSPRY      | VIKRVYR | TKA     | ---     | DNMIG   | S       | V       | S       | T       | E       | R       | L       | N      | I     | A     | G  | Y | V   | Y   | K  | SK | DD  | F     | V  | L  | I  | R | Q | H | G  | F  | P | A | E | A | F | F  | AP | P     | HLVFG |       |       |       |       |   |   |   |   |   |   |   |   |   |   |   |
| Methanoseta thermophila         | EHRK | --- | VILNTP    | EE  | YD        | LLALIG  | TSPRY      | VIKRVYR | TKA     | ---     | GEIAA   | VSTQ    | RNLMA   | GRYVYK  | SKDDF   | VMIVRCQ | GNLPA   | VGEVLE  | EAF    | FAPP  | HLVAG |    |   |     |     |    |    |     |       |    |    |    |   |   |   |    |    |   |   |   |   |   |    |    |       |       |       |       |       |       |   |   |   |   |   |   |   |   |   |   |   |
| Methanosphaera stadtmanae       | GHHK | --- | VFLDTP    | EE  | YD        | LLALIG  | TSPRY      | VIKRVYR | TKA     | ---     | IAA     | V       | S       | T       | E       | R       | L       | N       | I      | A     | G     | Y  | V | Y   | K   | SK | DD | F   | V     | L  | I  | R  | Q | H | G | F  | P  | A | E | A | F | F | AP | P  | HLVAG |       |       |       |       |       |   |   |   |   |   |   |   |   |   |   |   |
| Methanothermobacter thermautot  | GHHK | --- | VFLDTP    | EE  | YD        | LLALIG  | TSPRY      | VIKRVYR | TKA     | ---     | IAA     | V       | S       | T       | E       | R       | L       | N       | I      | A     | G     | Y  | V | Y   | K   | SK | DD | F   | V     | L  | I  | R  | Q | H | G | F  | P  | A | E | A | F | F | AP | P  | HLVAG |       |       |       |       |       |   |   |   |   |   |   |   |   |   |   |   |
| Moorella thermoacetica          | QNKK | --- | ILLNTP    | KE  | YD        | LLALIG  | TSPRY      | VIKRVYR | TKA     | ---     | IAA     | T       | S       | A       | D       | K       | L       | S       | K      | V     | G     | Y  | V | Y   | K   | SK | DD | F   | V     | L  | I  | R  | Q | H | G | F  | P  | A | E | A | F | F | AP | P  | HLVAG |       |       |       |       |       |   |   |   |   |   |   |   |   |   |   |   |
| Methanococcus maripaludis       | AHKK | --- | VFLDAP    | EE  | YD        | LLALIG  | TSPRY      | VIKRVYR | TKA     | ---     | IAA     | V       | S       | T       | E       | R       | L       | N       | I      | A     | G     | Y  | V | Y   | K   | SK | DD | F   | V     | L  | I  | R  | Q | H | G | F  | P  | A | E | A | F | F | AP | P  | HLVAG |       |       |       |       |       |   |   |   |   |   |   |   |   |   |   |   |
| Methanococcus vannielii         | EHRK | --- | VFMTP     | PE  | E         | YD      | LLALIG     | TSPRY   | VIKRVYR | TKA     | ---     | ITAV    | S       | S       | E       | K       | L       | N       | I      | A     | G     | Y  | V | Y   | K   | SK | DD | F   | V     | L  | I  | R  | Q | H | G | F  | P  | A | E | A | F | F | AP | P  | HLVAG |       |       |       |       |       |   |   |   |   |   |   |   |   |   |   |   |
| Methanococcus voltae            | DHKK | --- | VLMSTP    | VE  | YD        | LLALIG  | TSPRY      | VIKRVYR | TKA     | ---     | IAA     | V       | S       | T       | E       | R       | L       | N       | I      | A     | G     | Y  | V | Y   | K   | SK | DD | F   | V     | L  | I  | R  | Q | H | G | F  | P  | A | E | A | F | F | AP | P  | HLVAG |       |       |       |       |       |   |   |   |   |   |   |   |   |   |   |   |
| Methanococcus marisnigri        | KRRK | --- | ILFNTP    | EE  | YD        | LLALIG  | TSPRY      | VIKRVYR | TKA     | ---     | GLI     | A       | S       | T       | Q       | R       | L       | N       | I      | A     | G     | Y  | V | Y   | K   | SK | DD | F   | V     | L  | I  | R  | Q | H | G | F  | P  | A | E | A | F | F | AP | P  | HLVAG |       |       |       |       |       |   |   |   |   |   |   |   |   |   |   |   |
| Methanopyrus kandleri           | DQKK | --- | VILNTP    | EE  | YD        | LLALIG  | TSPRY      | VIKRVYR | TKA     | ---     | AB      | R       | I       | A       | A       | V       | T       | S       | T      | E     | R     | L  | N | I   | A   | G  | Y  | V   | Y     | K  | SK | DD | F | V | L | I  | R  | Q | H | G | F | P | A  | E  | A     | F     | F     | AP    | P     | HLVAG |   |   |   |   |   |   |   |   |   |   |   |
| Methanoseta thermophila         | DHKK | --- | VFMSCP    | EE  | YD        | LLALIG  | TSPRY      | VIKRVYR | TKA     | ---     | GLI     | A       | S       | T       | Q       | R       | L       | N       | I      | A     | G     | Y  | V | Y   | K   | SK | DD | F   | V     | L  | I  | R  | Q | H | G | F  | P  | A | E | A | F | F | AP | P  | HLVAG |       |       |       |       |       |   |   |   |   |   |   |   |   |   |   |   |
| Methanosphaera stadtmanae       | ENKK | --- | VVMSCP    | EE  | YD        | LLALIG  | TSPRY      | VIKRVYR | TKA     | ---     | IAA     | V       | S       | T       | E       | R       | L       | N       | I      | A     | G     | Y  | V | Y   | K   | SK | DD | F   | V     | L  | I  | R  | Q | H | G | F  | P  | A | E | A | F | F | AP | P  | HLVAG |       |       |       |       |       |   |   |   |   |   |   |   |   |   |   |   |
| Methanothermobacter thermautot  | EHRK | --- | VMA       | C   | P         | E       | YD         | LLALIG  | TSPRY   | VIKRVYR | TKA     | ---     | IAA     | V       | S       | T       | E       | R       | L      | N     | I     | A  | G | Y   | V   | Y  | K  | SK  | DD    | F  | V  | L  | I | R | Q | H  | G  | F | P | A | E | A | F  | F  | AP    | P     | HLVAG |       |       |       |   |   |   |   |   |   |   |   |   |   |   |
| Moorella thermoacetica          | KNER | --- | VEFSLP    | EE  | YD        | LLALIG  | TSPRY      | VIKRVYR | TKA     | ---     | GEIAA   | VSTQ    | RNLMA   | GRYVYK  | SKDDF   | VMIVRCQ | GNLPA   | VGEVLE  | EAF    | FAPP  | HLVAG |    |   |     |     |    |    |     |       |    |    |    |   |   |   |    |    |   |   |   |   |   |    |    |       |       |       |       |       |       |   |   |   |   |   |   |   |   |   |   |   |
| Natranaerobius thermophilus     | HTEQ | --- | DRIIQ     | L   | N         | T       | P          | E       | YD      | LLALIG  | TSPRY   | VIKRVYR | TKA     | ---     | EQA     | A       | A       | A       | S      | T     | R     | L  | N | I   | A   | G  | Y  | V   | Y     | K  | SK | DD | F | V | L | I  | R  | Q | H | G | F | P | A  | E  | A     | F     | F     | AP    | P     | HLVAG |   |   |   |   |   |   |   |   |   |   |   |
| Nitrococcus mobilis             | HTAC | --- | DRVIE     | L   | V         | A       | P          | E       | YD      | LLALIG  | TSPRY   | VIKRVYR | TKA     | ---     | EQA     | A       | V       | S       | T      | R     | L     | N  | I | A   | G   | Y  | V  | Y   | K     | SK | DD | F  | V | L | I | R  | Q  | H | G | F | P | A | E  | A  | F     | F     | AP    | P     | HLVAG |       |   |   |   |   |   |   |   |   |   |   |   |
| Nitrosopumilus maritimus        | --KA | --- | QIAELQ    | W   | EDK       | PIE     | AALMY      | PGRV    | VSVET   | RDG     | ---     | EPILA   | S       | A       | S       | T       | R       | L       | N      | I     | A     | G  | Y | V   | Y   | K  | SK | DD  | F     | V  | L  | I  | R | Q | H | G  | F  | P | A | E | A | F | F  | AP | P     | HLVAG |       |       |       |       |   |   |   |   |   |   |   |   |   |   |   |
| Pelotomaculum thermopropionicu  | ENKK | --- | ITFSCP    | EE  | YD        | LLALIG  | TSPRY      | VIKRVYR | TKA     | ---     | GEIAA   | VSTQ    | RNLMA   | GRYVYK  | SKDDF   | VMIVRCQ | GNLPA   | VGEVLE  | EAF    | FAPP  | HLVAG |    |   |     |     |    |    |     |       |    |    |    |   |   |   |    |    |   |   |   |   |   |    |    |       |       |       |       |       |       |   |   |   |   |   |   |   |   |   |   |   |
| Petrotoga mobilis               | ERRK | --- | IFLCP     | DE  | YD        | LLALIG  | TSPRY      | VIKRVYR | TKA     | ---     | GEIAA   | VSTQ    | RNLMA   | GRYVYK  | SKDDF   | VMIVRCQ | GNLPA   | VGEVLE  | EAF    | FAPP  | HLVAG |    |   |     |     |    |    |     |       |    |    |    |   |   |   |    |    |   |   |   |   |   |    |    |       |       |       |       |       |       |   |   |   |   |   |   |   |   |   |   |   |
| Picrophilus torridus            | EGKR | --- | IMLSL     | P   | E         | YD      | LLALIG     | TSPRY   | VIKRVYR | TKA     | ---     | DEQ     | A       | V       | A       | T       | S       | T       | Q      | R     | L     | N  | I | A   | G   | Y  | V  | Y   | K     | SK | DD | F  | V | L | I | R  | Q  | H | G | F | P | A | E  | A  | F     | F     | AP    | P     | HLVAG |       |   |   |   |   |   |   |   |   |   |   |   |
| Pyrobaculum aerophilum          | EHRK | --- | VLLKTP    | EE  | YD        | LLALIG  | TSPRY      | VIKRVYR | TKA     | ---     | DGAP    | A       | A       | A       | V       | S       | T       | E       | R      | L     | N     | I  | A | G   | Y   | V  | Y  | K   | SK    | DD | F  | V  | L | I | R | Q  | H  | G | F | P | A | E | A  | F  | F     | AP    | P     | HLVAG |       |       |   |   |   |   |   |   |   |   |   |   |   |
| Pyrobaculum arsenaticum         | EHRK | --- | VLLKTP    | EE  | YD        | LLALIG  | TSPRY      | VIKRVYR | TKA     | ---     | DGAP    | A       | A       | A       | V       | S       | T       | E       | R      | L     | N     | I  | A | G   | Y   | V  | Y  | K   | SK    | DD | F  | V  | L | I | R | Q  | H  | G | F | P | A | E | A  | F  | F     | AP    | P     | HLVAG |       |       |   |   |   |   |   |   |   |   |   |   |   |
| Pyrobaculum caldicellulosum     | EHRK | --- | VLLKTP    | EE  | YD        | LLALIG  | TSPRY      | VIKRVYR | TKA     | ---     | DGAP    | A       | A       | A       | V       | S       | T       | E       | R      | L     | N     | I  | A | G   | Y   | V  | Y  | K   | SK    | DD | F  | V  | L | I | R | Q  | H  | G | F | P | A | E | A  | F  | F     | AP    | P     | HLVAG |       |       |   |   |   |   |   |   |   |   |   |   |   |
| Pyrobaculum islandicum          | EHRK | --- | VLLKTP    | EE  | YD        | LLALIG  | TSPRY      | VIKRVYR | TKA     | ---     | DGAP    | A       | A       | A       | V       | S       | T       | E       | R      | L     | N     | I  | A | G   | Y   | V  | Y  | K   | SK    | DD | F  | V  | L | I | R | Q  | H  | G | F | P | A | E | A  | F  | F     | AP    | P     | HLVAG |       |       |   |   |   |   |   |   |   |   |   |   |   |
| Pyrococcus abyssi               | EHRK | --- | VIMNSP    | EE  | YD        | LLALIG  | TSPRY      | VIKRVYR | TKA     | ---     | DEQ     | A       | V       | A       | V       | S       | T       | E       | R      | L     | N     | I  | A | G   | Y   | V  | Y  | K   | SK    | DD | F  | V  | L | I | R | Q  | H  | G | F | P | A | E | A  | F  | F     | AP    | P     | HLVAG |       |       |   |   |   |   |   |   |   |   |   |   |   |
| Pyrococcus furiosus             | EHRK | --- | VIMNSP    | EE  | YD        | LLALIG  | TSPRY      | VIKRVYR | TKA     | ---     | DEQ     | A       | V       | A       | V       | S       | T       | E       | R      | L     | N     | I  | A | G   | Y   | V  |    |     |       |    |    |    |   |   |   |    |    |   |   |   |   |   |    |    |       |       |       |       |       |       |   |   |   |   |   |   |   |   |   |   |   |

|                                 | 310   | 320   | 330   | 340            | 350   | 360   | 370     | 380  | 390  | 400  |        |      |     |      |      |      |      |      |      |       |       |       |       |       |      |       |       |    |    |    |    |    |     |    |    |    |    |    |   |    |   |    |   |   |   |   |   |   |    |   |   |   |   |   |   |   |   |    |
|---------------------------------|-------|-------|-------|----------------|-------|-------|---------|------|------|------|--------|------|-----|------|------|------|------|------|------|-------|-------|-------|-------|-------|------|-------|-------|----|----|----|----|----|-----|----|----|----|----|----|---|----|---|----|---|---|---|---|---|---|----|---|---|---|---|---|---|---|---|----|
| Aciduliprofundum boonei 1       | WMRGS | HNGPL | MPLPV | SIKO           | ----- | AHCT  | RDGPP   | RVAA | LGFO | QVAN | -GKLV  | GP-V | DLF | DDP  | AFDR | ARE  | TAQY | IADY | YRMR | HGPF  | EPHRL | PL    | EE    | ME    | IT   | -T    |       |    |    |    |    |    |     |    |    |    |    |    |   |    |   |    |   |   |   |   |   |   |    |   |   |   |   |   |   |   |   |    |
| Aciduliprofundum boonei 2       | WMRGS | HNGPL | MPLPV | SIKO           | ----- | AHCT  | RDGPP   | RVAA | LGFO | QVAN | -GRLV  | GP-V | DLF | DDP  | AFDR | ARE  | TAQY | IADY | YRMR | HGPF  | EPHRL | PL    | EE    | ME    | IT   | -T    |       |    |    |    |    |    |     |    |    |    |    |    |   |    |   |    |   |   |   |   |   |   |    |   |   |   |   |   |   |   |   |    |
| Aeropyrum pernix                | WMRGS | HNGPL | MPLPV | GLKD           | ----- | SKVSR | FDGPP   | RVIA | LGFO | VKN  | -GELI  | GP-V | DLF | DDP  | AFDE | ARRQ | QAQI | ADY  | YRMR | HGPF  | EPHRL | PL    | EE    | ME    | IT   | -T    |       |    |    |    |    |    |     |    |    |    |    |    |   |    |   |    |   |   |   |   |   |   |    |   |   |   |   |   |   |   |   |    |
| Aquifex aeolicus                | WMRGS | HNGPL | MPLPV | SFED           | ----- | ARPS  | RDGPP   | RVIA | LGAG | QLAN | -GKLI  | GP-V | DMF | DDP  | AFDK | ARQV | ADMA | ILRR | QGIF | EPHRL | PL    | EE    | ME    | IT    | -T   |       |       |    |    |    |    |    |     |    |    |    |    |    |   |    |   |    |   |   |   |   |   |   |    |   |   |   |   |   |   |   |   |    |
| Archaeoglobus fulgidus          | WMRGS | HNGPL | MPLPV | PFKY           | ----- | SKCT  | RDGPP   | RVIA | LGAG | QLAN | -GKLI  | GP-V | DMF | DDP  | AFDY | TRQK | AMEI | AEY  | YRMR | HGPF  | EPHRL | PL    | EE    | ME    | IT   | -T    |       |    |    |    |    |    |     |    |    |    |    |    |   |    |   |    |   |   |   |   |   |   |    |   |   |   |   |   |   |   |   |    |
| Bradyrhizobium japonicum        | DARG  | SHVM  | PLMPV | PLNT           | ----- | PVTG  | MYC     | LPV  | SCV  | GS   | -IDR   | EG   | RF  | AE   | SY   | TD   | FF   | DN   | PA   | WD    | EV    | RR    | AR    | QK    | AE   | IM    | RS    | QW | GS | GA | AM | LP | VSE | LE | YG | -G |    |    |   |    |   |    |   |   |   |   |   |   |    |   |   |   |   |   |   |   |   |    |
| Caldivirga maquilingsensis      | WMRGS | HNGPL | MPLPV | SIVN           | ----- | SCPT  | RDGPP   | RVVA | LGFO | LAQ  | -GKLI  | GP-V | DMF | DDP  | AFDR | ARAL | CNEI | ADY  | YRMR | HGPF  | EPHRL | PL    | EE    | ME    | IT   | -T    |       |    |    |    |    |    |     |    |    |    |    |    |   |    |   |    |   |   |   |   |   |   |    |   |   |   |   |   |   |   |   |    |
| Candidatus Desulfurudis audax   | WMRGS | HNGPL | MPLPV | SERD           | ----- | ARPT  | RDGPP   | RVIA | LGFO | VKD  | -SKLI  | GP-V | DLF | DDP  | AFDE | TRRM | ANFI | ADY  | YRMR | HGPF  | EPHRL | PL    | EE    | ME    | IT   | -T    |       |    |    |    |    |    |     |    |    |    |    |    |   |    |   |    |   |   |   |   |   |   |    |   |   |   |   |   |   |   |   |    |
| Candidatus Korarchaeum cryptof  | WMRGS | HNGPL | LLPV  | GLCD           | ----- | ANCT  | RDGPP   | RVVC | FGFO | QVAN | -GALV  | GP-V | DLF | DDP  | AFDR | VRAR | CNEI | ADY  | YRMR | HGPF  | EPHRL | PL    | EE    | ME    | IT   | -T    |       |    |    |    |    |    |     |    |    |    |    |    |   |    |   |    |   |   |   |   |   |   |    |   |   |   |   |   |   |   |   |    |
| Candidatus Methanoregula boone  | WMRGS | HNGPL | MPLPV | SLED           | ----- | AVPT  | RDGPP   | RVCA | LGFO | LKE  | -GKLI  | GP-V | DLF | DDP  | AFDS | ARKK | AEI  | ADY  | YRMR | HGPF  | EPHRL | PL    | EE    | ME    | IT   | -T    |       |    |    |    |    |    |     |    |    |    |    |    |   |    |   |    |   |   |   |   |   |   |    |   |   |   |   |   |   |   |   |    |
| Carboxydibrachium pacificum     | WMRGS | HNGPL | MPLPV | SVD            | ----- | ATPS  | RDGPP   | RVIA | LGFO | LAD  | -GKLI  | GP-V | DMF | DDP  | AFDR | ARE  | MAI  | ADY  | YRMR | HGPF  | EPHRL | PL    | EE    | ME    | IT   | -T    |       |    |    |    |    |    |     |    |    |    |    |    |   |    |   |    |   |   |   |   |   |   |    |   |   |   |   |   |   |   |   |    |
| Carboxydotherrmus hydrogenoform | NTRG  | SHM   | PLMPV | RLNS           | ----- | PASIN | F       | CIP  | IV   | EAL  | V      | SMH  | -EG | RL   | T    | GP-V | DF   | G    | ST   | P     | DD    | W     | RR    | T     | AT   | TR    | RA    | H  | AM | RR | Q  | GF | VH  | PA | TV | LP | VE | LE | Y | AE | G |    |   |   |   |   |   |   |    |   |   |   |   |   |   |   |   |    |
| Cenarchaeum symbiosum           | DARG  | SHM   | PLMPV | PVINT          | ----- | PVTG  | Y       | CP   | LI   | S    | AL     | G    | F   | S    | M    | N    | K    | Q    | G    | F     | A     | G     | R     | V     | D    | F     | F     | A  | G  | S  | A  | W  | D   | A  | R  | Y  | V  | S  | R | R  | A | E  | I | R | R | G | F | M | I  | A | M | A | E | I | A | V | T | -G |
| Dehalococcoides ethenogenes     | WMRGS | HNGPL | MPLPV | SIED           | ----- | STPT  | RDGPP   | RVTA | LGFO | LSN  | -GMLI  | GP-V | DMF | DDP  | AFDN | ARQ  | KS   | LDMA | DMR  | HGPF  | EPHRL | PL    | EE    | ME    | IT   | -T    |       |    |    |    |    |    |     |    |    |    |    |    |   |    |   |    |   |   |   |   |   |   |    |   |   |   |   |   |   |   |   |    |
| Dehalococcoides sp.             | WMRGS | HNGPL | MPLPV | SIED           | ----- | STPT  | RDGPP   | RVTA | LGFO | LSN  | -GMLI  | GP-V | DMF | DDP  | AFDN | ARQ  | KS   | LDMA | DMR  | HGPF  | EPHRL | PL    | EE    | ME    | IT   | -T    |       |    |    |    |    |    |     |    |    |    |    |    |   |    |   |    |   |   |   |   |   |   |    |   |   |   |   |   |   |   |   |    |
| Desulfurococcus kamchatkensis   | WMRGS | HNGPL | MPLPV | PMRY           | ----- | ARVT  | RDGPP   | RVIA | LGWN | ISN  | -GKLI  | GP-V | DLF | DDP  | AFDE | TRRL | AO   | FI   | AE   | YRMR  | HGPF  | EPHRL | PL    | EE    | ME   | IT    | -T    |    |    |    |    |    |     |    |    |    |    |    |   |    |   |    |   |   |   |   |   |   |    |   |   |   |   |   |   |   |   |    |
| Hydrogenivirga sp.              | WMRGS | HNGPL | MPLPV | SFED           | ----- | ARPS  | RDGPP   | RVIA | LGQ  | LS   | -GKLV  | GP-V | DMF | DDP  | AFDK | ARV  | AO   | DM   | ILRR | QGIF  | EPHRL | PL    | EE    | ME    | IT   | -T    |       |    |    |    |    |    |     |    |    |    |    |    |   |    |   |    |   |   |   |   |   |   |    |   |   |   |   |   |   |   |   |    |
| Hydrogenobaculum sp.            | WMRGS | HNGPL | MPLPV | GFED           | ----- | ATPS  | RDGPP   | RVIA | LGFO | QIAN | -GMLV  | GP-V | DMF | DDP  | AFDK | ARV  | AO   | DM   | ILRR | QGIF  | EPHRL | PL    | EE    | ME    | IT   | -T    |       |    |    |    |    |    |     |    |    |    |    |    |   |    |   |    |   |   |   |   |   |   |    |   |   |   |   |   |   |   |   |    |
| Hyperthermus butylicus          | WMRGS | HNGPL | MPLPV | SIRD           | ----- | ARCT  | RDGPP   | RVIA | LGFO | VTK  | -GKLI  | GP-V | DLF | DDP  | AFDE | ARRL | AO   | ADY  | YRMR | HGPF  | EPHRL | PL    | EE    | ME    | IT   | -T    |       |    |    |    |    |    |     |    |    |    |    |    |   |    |   |    |   |   |   |   |   |   |    |   |   |   |   |   |   |   |   |    |
| Ignicoccus hospitalis           | WMRGS | HNGPL | MPLPV | VRD            | ----- | ARPT  | RDGPP   | RVIA | LGFO | VKN  | -AKLV  | GP-V | DLF | DDP  | AFDE | ARRT | ANK  | ADY  | YRMR | HGPF  | EPHRL | PL    | EE    | ME    | IT   | -T    |       |    |    |    |    |    |     |    |    |    |    |    |   |    |   |    |   |   |   |   |   |   |    |   |   |   |   |   |   |   |   |    |
| Metallosphaera sedula           | WMRGS | HNGPL | MPLPV | SQRD           | ----- | AKAT  | RDGPP   | RVIA | LGFO | VKN  | -GKLT  | GP-V | DLF | DDP  | AFDE | TRRM | AS   | VT   | ADY  | YRMR  | HGPF  | EPHRL | PL    | EE    | ME   | IT    | -T    |    |    |    |    |    |     |    |    |    |    |    |   |    |   |    |   |   |   |   |   |   |    |   |   |   |   |   |   |   |   |    |
| Methanobrevibacter smithii      | WMRGS | HNGPL | MPLPV | SQD            | ----- | ANPI  | RDGPP   | RVIA | LGFO | VSE  | -AKLI  | GP-V | DLF | DDP  | AFDP | TR   | RES  | ARI  | ADY  | YRMR  | HGPF  | EPHRL | PL    | EE    | ME   | IT    | -S    |    |    |    |    |    |     |    |    |    |    |    |   |    |   |    |   |   |   |   |   |   |    |   |   |   |   |   |   |   |   |    |
| Methanocaldococcus jannaschii   | WMRGS | HNGPL | MPLPV | GEE            | ----- | ATPT  | RDGPP   | RVIA | LGFO | VCD  | -GMLI  | GP-V | NDF | AD   | KG   | FK   | ARE  | K    | AE   | MA    | I     | R     | R     | G     | F    | Q     | P     | H  | R  | L  | P  | A  | T   | M  | E  | I  | T  | -S |   |    |   |    |   |   |   |   |   |   |    |   |   |   |   |   |   |   |   |    |
| Methanococcus aeolicus          | WMRGS | HNGPL | MPLPV | GEDD           | ----- | ANPT  | RDGPP   | RVIA | LGFO | LSK  | -GRLV  | GP-V | NDF | AD   | VG   | FS   | ARK  | K    | AE   | MA    | I     | R     | R     | G     | F    | Q     | P     | H  | R  | L  | P  | A  | T   | M  | E  | I  | T  | -S |   |    |   |    |   |   |   |   |   |   |    |   |   |   |   |   |   |   |   |    |
| Methanococcus maripaludis       | WMRGS | HNGPL | MPLPV | AEED           | ----- | AMPA  | RDGPP   | RVIA | LGFO | LSH  | -GRLV  | GP-V | NDF | AD   | KS   | FK   | ARE  | K    | AE   | MA    | I     | R     | R     | G     | F    | Q     | P     | H  | R  | L  | P  | A  | T   | M  | E  | I  | T  | -S |   |    |   |    |   |   |   |   |   |   |    |   |   |   |   |   |   |   |   |    |
| Methanococcus vannielii         | WMRGS | HNGPL | MPLPV | AEED           | ----- | ARPA  | RDGPP   | RVIA | LGFO | LSH  | -GRLV  | GP-V | NDF | AD   | KS   | FK   | ARE  | K    | AE   | MA    | I     | R     | R     | G     | F    | Q     | P     | H  | R  | L  | P  | A  | T   | M  | E  | I  | T  | -S |   |    |   |    |   |   |   |   |   |   |    |   |   |   |   |   |   |   |   |    |
| Methanococcus voltae            | WMRGS | HNGPL | MPLPV | GEE            | ----- | AMPS  | RDGPP   | RVIA | LGFO | LSK  | -GRLV  | GP-V | NDF | AD   | VG   | FS   | ARK  | K    | AE   | MA    | I     | R     | R     | G     | F    | Q     | P     | H  | R  | L  | P  | A  | T   | M  | E  | I  | T  | -S |   |    |   |    |   |   |   |   |   |   |    |   |   |   |   |   |   |   |   |    |
| Methanoculleus marisnigri       | WMRGS | HNGPL | MPLPV | GVED           | ----- | ANCT  | RDGPP   | RVIA | LGFO | VCN  | -GKLI  | GP-V | DMF | DDP  | AFDN | ARV  | AO   | DM   | ILRR | QGIF  | EPHRL | PL    | EE    | ME    | IT   | -T    |       |    |    |    |    |    |     |    |    |    |    |    |   |    |   |    |   |   |   |   |   |   |    |   |   |   |   |   |   |   |   |    |
| Methanopyrus kandleri           | WMRGS | HNGPL | MPLPV | SSEE           | ----- | AHPT  | RDGPP   | RVIA | LGFO | LRN  | -GELV  | GP-V | DLF | DDP  | AFDR | AR   | AE   | VI   | ADY  | YRMR  | HGPF  | EPHRL | PL    | EE    | ME   | IT    | -T    |    |    |    |    |    |     |    |    |    |    |    |   |    |   |    |   |   |   |   |   |   |    |   |   |   |   |   |   |   |   |    |
| Methanosacta thermophila        | WMRGS | HNGPL | MPLPV | CAFED          | ----- | AHPT  | RDGPP   | RVIA | LGFO | LCN  | -GLLI  | GP-V | DLF | DDP  | AFDL | TR   | MR   | VE   | IT   | ADY   | YRMR  | HGPF  | EPHRL | PL    | EE   | ME    | IT    | -T |    |    |    |    |     |    |    |    |    |    |   |    |   |    |   |   |   |   |   |   |    |   |   |   |   |   |   |   |   |    |
| Methanosphaera stadtmanae       | WMRGS | HNGPL | MPLPV | SQAD           | ----- | ARPV  | RDGPP   | RVIA | LGFO | VSE  | -AKLI  | GP-V | DMF | DDP  | AFDP | TR   | ARN  | T    | AK   | VA    | N     | YRMR  | HGPF  | EPHRL | PL   | EE    | ME    | IT | -S |    |    |    |     |    |    |    |    |    |   |    |   |    |   |   |   |   |   |   |    |   |   |   |   |   |   |   |   |    |
| Methanothermobacter thermautot  | WMRGS | HNGPL | MPLPV | QAQRD          | ----- | ATPV  | RDGPP   | RVIA | LGFO | VAD  | -GKLV  | GP-V | DMF | DDP  | AFDR | S    | R    | Q    | L    | A     | E     | V     | A     | E     | YRMR | HGPF  | EPHRL | PL | EE | ME | IT | -S |     |    |    |    |    |    |   |    |   |    |   |   |   |   |   |   |    |   |   |   |   |   |   |   |   |    |
| Moorella thermoacetica          | WMRGS | HNGPL | MPLPV | GLDQ           | ----- | SAPT  | RDGPP   | RVIA | LGFO | LSD  | -GRLV  | GP-V | DMF | DDP  | AFDV | AR   | Q    | T    | A    | E     | I     | A     | E     | YRMR  | HGPF | EPHRL | PL    | EE | ME | IT | -G |    |     |    |    |    |    |    |   |    |   |    |   |   |   |   |   |   |    |   |   |   |   |   |   |   |   |    |
| Natronaerobius thermophilus     | FMRG  | SHHG  | PLMPV | KKNT           | ----- | VSYF  | DGPP    | RVIA | LGFO | CVS  | -EG    | KL   | T   | EP-V | DC   | F    | Q    | P    | DD   | H     | R     | D     | K     | S     | R    | K     | S     | L  | D  | R  | Q  | F  | G   | S  | A  | M  | L  | P  | V | S  | E | L  | E | Y | G |   |   |   |    |   |   |   |   |   |   |   |   |    |
| Nitrococcus mobilis             | WMRGS | HNGPL | MPLPV | CPLNT          | ----- | PVSY  | DGPP    | RVIA | LGFO | LAC  | -EG    | RL   | T   | EP-V | D    | A    | F    | A    | P    | W     | D     | S     | V     | R     | E    | T     | A     | A  | K  | A  | M  | I  | R   | R  | G  | F  | Q  | P  | H | R  | L | P  | A | T | M | E | I | T | -G |   |   |   |   |   |   |   |   |    |
| Nitrosopumilus maritimus        | NTRG  | SHM   | PLMPV | KLNS           | ----- | AATN  | F       | CIP  | IV   | EAL  | V      | SMH  | -NG | KL   | T    | GP-V | DF   | G    | ST   | P     | DD    | W     | RR    | T     | AT   | TR    | RA    | H  | AM | RR | Q  | GF | VH  | PA | TV | LP | VE | LE | Y | AE | G |    |   |   |   |   |   |   |    |   |   |   |   |   |   |   |   |    |
| Pelotomaculum thermopropionicu  | WMRGS | HNGPL | MPLPV | SVAQ           | ----- | SNPT  | RDGPP   | RVIA | LGFO | LSD  | -GKLV  | GP-V | DMF | DDP  | AFDL | AR   | Q    | K    | A    | E     | I     | A     | E     | YRMR  | HGPF | EPHRL | PL    | EE | ME | IT | -T |    |     |    |    |    |    |    |   |    |   |    |   |   |   |   |   |   |    |   |   |   |   |   |   |   |   |    |
| Petrotoga mobilis               | WMRGS | HNGPL | MPLPV | SFKD           | ----- | AHCT  | RDGPP   | RVIA | LGFO | LSH  | -GNFI  | GP-V | DLF | DDP  | AFDL | SR   | K    | K    | AE   | MA    | I     | R     | R     | G     | F    | Q     | P     | H  | R  | L  | P  | A  | T   | M  | E  | I  | T  | -T |   |    |   |    |   |   |   |   |   |   |    |   |   |   |   |   |   |   |   |    |
| Picrophilus torridus            | WMRGS | HNGPL | MPLPV | SFKN           | ----- | SRMT  | RDGPP   | RVIA | LGFO | VLD  | -GRLA  | GP-V | DMF | DDP  | AFDY | AR   | T    | K    | AE   | MA    | I     | R     | R     | G     | F    | Q     | P     | H  | R  | L  | P  | A  | T   | M  | E  | I  | T  | -A |   |    |   |    |   |   |   |   |   |   |    |   |   |   |   |   |   |   |   |    |
| Pyrobaculum aerophilum          | WMRGS | HNGPL | MPLPV | ISVDPERRIAI    | ----- | GAKM  | TRFDGPP | RVIA | LGFO | LHD  | -GYLEG | GP-V | DLF | DDP  | AFDY | VR   | Q    | AA   | QI   | ADY   | YRMR  | HGPF  | EPHRL | PL    | EE   | ME    | IT    | -A |    |    |    |    |     |    |    |    |    |    |   |    |   |    |   |   |   |   |   |   |    |   |   |   |   |   |   |   |   |    |
| Pyrobaculum arsenaticum         | WMRGS | HNGPL | MPLPV | ARFISIDPEKRIAI | ----- | GAKM  | TRFDGPP | RVIA | LGFO | LHD  | -GYLEG | GP-V | DLF | DDP  | AFDY | VR   | Q    | AA   | QI   | ADY   | YRMR  | HGPF  | EPHRL | PL    | EE   | ME    | IT    | -A |    |    |    |    |     |    |    |    |    |    |   |    |   |    |   |   |   |   |   |   |    |   |   |   |   |   |   |   |   |    |
| Pyrobaculum caldifontis         | WMRGS | HNGPL | MPLPV | AKFYHIDPEKRIAI | ----- | GAKM  | TRFDGPP | RVIA | LGFO | LHD  | -GYLEG | GP-V | DLF | DDP  | AFDY | VR   | Q    | AA   | QI   | ADY   | YRMR  | HGPF  | EPHRL | PL    | EE   | ME    | IT    | -A |    |    |    |    |     |    |    |    |    |    |   |    |   |    |   |   |   |   |   |   |    |   |   |   |   |   |   |   |   |    |
| Pyrobaculum islandicum          | WMRGS | HNGPL | MPLPV | ARFISIDPEKRIAI | ----- | GAKM  | TRFDGPP | RVIA | LGFO | LHD  | -GYLEG | GP-V | DLF | DDP  | AFDY | VR   | Q    | AA   | QI   | ADY   | YRMR  | HGPF  | EPHRL | PL    | EE   | ME    | IT    | -A |    |    |    |    |     |    |    |    |    |    |   |    |   |    |   |   |   |   |   |   |    |   |   |   |   |   |   |   |   |    |
| Pyrococcus abyssii              | WMRGS | HNGPL | MPLPV | PLKY           | ----- | ATPT  | RDGPP   | RVIA | LGFO | QIS  | -PE    | G    | L   | I    | GP-V | DLF  | DDP  | AFDY | AR   | Q     | K     | A     | E     | I     | YRMR | HGPF  | EPHRL | PL | EE | ME | IT | -T |     |    |    |    |    |    |   |    |   |    |   |   |   |   |   |   |    |   |   |   |   |   |   |   |   |    |
| Pyrococcus furiosus             | WMRGS | HNGPL | MPLPV | PLKY           | ----- | ATPT  | RDGPP   | RVIA | LGFO | QIS  | -PE    | G    | L   | I    | GP-V | DLF  | DDP  | AFDY | AR   | Q     | K     | A     | E     | I     | YRMR | HGPF  | EPHRL | PL | EE | ME | IT | -T |     |    |    |    |    |    |   |    |   |    |   |   |   |   |   |   |    |   |   |   |   |   |   |   |   |    |
| Pyrococcus horikoshii           | WMRGS | HNGPL | MPLPV | PLKY           | ----- | ATPT  | RDGPP   | RVIA | LGFO | QIS  | -PE    | G    | L   | I    | GP-V | DLF  | DDP  | AFDY | AR   | Q     | K     | A     | E     | I     | YRMR | HGPF  | EPHRL | PL | EE | ME | IT | -T |     |    |    |    |    |    |   |    |   |    |   |   |   |   |   |   |    |   |   |   |   |   |   |   |   |    |
| Roseiflexus castenholzii        | WMRGS | HNGPL | MPLPV | CRIGD          | ----- | AHPG  | RDGPP   | RVIA | LGFO | QIAE | -GRLI  | GP-V | DMF | DDP  | AFDE | AR   | L    | C    | N    | V     | I     | A     | D     | H     | R    | R     | H     | G  | F  | Q  | P  | H  | R   | L  | P  | A  | T  | M  | E | I  | T | -T |   |   |   |   |   |   |    |   |   |   |   |   |   |   |   |    |
| Roseiflexus sp.                 | WMRGS | HNGPL | MPLPV | CRIGD          | ----- | AHPG  | RDGPP   | RVIA | LGFO | QIAE | -GRLI  | GP-V | DMF | DDP  | AFDE | AR   | L    | C    |      |       |       |       |       |       |      |       |       |    |    |    |    |    |     |    |    |    |    |    |   |    |   |    |   |   |   |   |   |   |    |   |   |   |   |   |   |   |   |    |

```

          410      420      430      440
...|...|...|...|...|...|...|...|
Aciduliprofundum boonei 1  LPKVLTKLDRFFEKIQ-----
Aciduliprofundum boonei 2  LPKVLTKLDRFFEKIQ-----
Aeropyrum pernix          LPEVLKRLKDRFFPVEMGY---KPKVKHE---SGEADVD
Aquifex aeolicus         LPKVLKLENRFDTEV-EKLESEQKIEKEDMD-----
Archaeoglobus fulgidus   LPKVLEKLKRFEV-----
Bradyrhizobium japonicum FRDTVSGLLKRFLRDRRPEAAE-----
Caldivirga maquilingensis LPQILSTLKPIPVEEYERNRLKYISEKISPVAIAGGSTGD
Candidatus Desulforudis audaxv MPLVMSKLKRFIDLRLSKTKS-----
Candidatus Korarchaeum cryptof LPEVLKLEGKFRHE-----
Candidatus Methanoregula boone LPAVEKLENRWKLLE-----
Carboxydibrachium pacificum LPHLMEKLKDRWEKD-----
Carboxydotherrmus hydrogenoform LPVLEKLKDRFVKA-----
Cenarchaeum symbiosum      YRSRMDVLDSKMVPLKDSGPAGTGR--AYEDPD
Coxiella burnetii         LVDTWKLDDEFELRKNG-----
Dehalococcoides ethenogenes MPQVSKLAGRFKPLED-----
Dehalococcoides sp.      MPQVSKLAGRFKPLKD-----
Desulfurococcus kamchatkensis LPVLEKLKDRFVKSEEEAKVVKHSDMLSGS-----
Hydrogenivirga sp.       LPKILKLENRFDIEE-QRLDKDQVIEKEDMD-----
Hydrogenobaculum sp.     LPKVIELSSRFFDVNNVSSDKSNMLVEDMD-----
Hyperthermus butylicus   LPQVLEKLKNRFAEAKDYEKYIKPKIKSELLTG-EETD
Ignicoccus hospitalis    LPQVLERLKDRFKPVKDLP---VPKVKSEMLSGAEEAHD
Metallosphaera sedula    LPTLEKLKPRFKKE---EDVKKAPSVYTSKDQGMD-----
Methanobrevibacter smithii LPQVMAKLEDRFEDME-----
Methanocaldococcus jannaschii VPKVLEALEDRFIPLEGLELIEEGGITRKDRGDVE-----
Methanococcus aeolicus   IKVVLALEDRFVPNEKH-EVVDKLTY--DVEDQS
Methanococcus maripaludis VPKVLAQLKDRFIDMEETCECKIDELR--ERGDME
Methanococcus vanniellii VPKVLAQLKGRFIDENCGCKIDQIR--NRGDME
Methanococcus voltae     VPKVLTLESRFEEIPEN-NCKLEKTT--DRGDLE
Methanoculleus marisnigri LPQVEKQFKDRWEDLPE-----
Methanopyrus kandleri    LPDVLKLEDRFEDLEE-----
Methanosaeata thermophila LPHVLKRLAERFEPAE-----
Methanosphaera stadtmanae LPQVLEKLEDRFEDM-----
Methanothermobacter thermautot LPQVLEKLGDRFEDME-----
Moorella thermoacetica   MPEVMAKLKNRFVKVDHRDDEPAAEELGAK-----
Natranaerobius thermophilus ITHKMEELEKRFDR-----
Nitrococcus mobilis     VAERIEQLRERFQNRTE-----
Nitrosopumilus maritimus YRARMDVLESKMKPMEGTD-SSGDRKENYEDPD-----
Pelotomaculum thermopropionicu MPEVSKRIKDRFEKLR-----
Petrogoba mobilis       LPQVLKLETRFEELE-----
Picrophilus torridus    LPKILEKLSSKFEKLSDLNELKEVQ-----
Pyrobaculum aerophilum  LPKILAKIKAYPADQYEKERRKYVEALVKGQKAEEAH-HD
Pyrobaculum arsenaticum LPKILAKIKAYPADQYEKERRKYIEAIVKGEKVGESQ-HD
Pyrobaculum calidifontis LPKILAKIKSYPADQYEKQRRKYVEEAIKGTPVEHSQ-HD
Pyrobaculum islandicum  LPKILAKVKSYPADQYEKERRKYIEAVVKGVKAEETQ-HD
Pyrococcus abyssi       LPQVLEKLKDRFEPIE-----
Pyrococcus furiosus     LPQVLEKLKDRFEPIE-----
Pyrococcus horikoshii   LPQVLEKLKDRFEPIE-----
Roseiflexus castenholzii LPEVMKLADRWQPVNGHAVSPEQVAYQ-----
Roseiflexus sp.         LPEVMKLADRWQPVNGHAVSGEVVETLPASVAS-----
Saccharopolyspora erythraea MATLEKRLADRWQPMEAAVPR-----
Staphylothermus marinus LPAVLEKLKDRFVKT-EEVHVIKRHSALLSGTSEEHD-
Sulfolobus acidocaldarius LPIILEKLSRRFKKE---SDVKVKSEISYSKESGPSGD-
Sulfolobus islandicus   LPLVIEKLKNRFKKE---TDMYKTKPSVYSHESSHE
Sulfolobus solfataricus LPLVIEKLKNRFKKE---TDMYKTKPSVYSHESSHE
Sulfolobus tokodaii     LPLILEKLKDRFKKE---SDVYKAKESIYAKESQGHD-
Syntrophus aciditrophicus IVEKMKILDERFKVRG-----
Thermoanaerobacter pseudethano LPHVVKLQRWKEE-----
Thermoanaerobacter tengcongens LPHLMEKLKDRWEKD-----
Thermococcus barophilus LPQVLEKLKDRFEPL-----
Thermococcus gammatolerans LPQVLKRLEERFEDIE-----
Thermococcus kodakarensis LPQVLKRLTDRFEPIE-----
Thermococcus onnurineus  LPQVLKRLEERFEDIE-----
Thermococcus sp.        LPQVLKRLEERFEDIE-----
Thermofilum pendens     LPSVLEKLKAR-----FVPAEAE-----
Thermoplasma acidophilum LPVMEKLKDRFVDIEKETLAK-----
Thermoplasma volcanium 1 LPAVVEKLKNRFVDIEKQEVAK-----
Thermoplasma volcanium 2 LPAVVEKLKNRFVDIEKQEVAK-----
Thermoproteus neutrophilus LPKILAKVKPYPADQYEKDRKKYIEAVVKGARVEESQ-HD
Thermoproteus tenax     LPKILAKIQSFSADDYEKNRQAYIKRALASAGLVEAQSHD
Thermus aquaticus       IAERLKALEREFS-----
Thermus thermophilus   IAERLKALEREFS-----
uncultured crenarchaeote YKARMSVLESKMKPMKEDKSNTDRKENYEDPD-----
uncultured marine crenarchaeot YKAVMDVLHSKMKPIQDQQ-QNDQRKESYEDPD-----
uncultured marine crenarchaeot YNAIMDVLHSKMKPIQDQP-QKDQRKESYEDPD-----
uncultured marine crenarchaeot YKDIMDVLHSKMKPVQAQP-QNDQRKESYEDPD-----
Consensus

```

**Figure S15 Multiple sequence alignment of FBP aldolases/phosphatases.** The conserved lysine 232 and tyrosine 348 assumed to participate in the catalytic cycle are highlighted with yellow boxes. The conserved stretch of 5 amino acids mentioned in the text is marked by a box. The alignment was made by using CLUSTAL W implemented within BioEdit software (<http://www.mbio.ncsu.edu/BioEdit/bioedit.html>).

## Supplementary Tables

**Table S11 Distribution of putative aldolase and FBP phosphatase genes among completely sequenced archaeal genomes.** Red columns indicate missing genes, green columns present genes (cut off value = 1E-45). The organisms are grouped and marked by a colour code as in Fig. 2. None of the archaeal genomes contains a classical FBP aldolase of class I or class II and columns were therefore omitted. In contrast all Archaea except very few methanogens and halobacteria possess the FBP aldolase/phosphatase gene (formerly designated archaeal type V FBP phosphatase). Most of the genomes lacking the FBP aldolase/phosphatase gene contain the gene for a classical FBP phosphatase (class I or II; expect values in these cases are partially higher than 1E-45 and therefore marked red/green). Only few Archaea possess an additional FBP phosphatase/inositol monophosphatase belonging to class IV phosphatases. Aldolases are also required in the biosynthesis of aromatic amino acids. Some Archaea use the classical pathway with 3-deoxy-D-arabino heptulosonate 7-phosphate (DAHP) synthase [EC 2.5.1.54] as key enzyme; those are lacking the gene coding for 2-amino-3,7-dideoxy-D-threo-hept-6-ulosonic acid (ADH) synthase, which is the key enzyme of an archaeal pathway<sup>1</sup>. ADH synthase has also low FBP aldolase side activity<sup>2</sup>, which, however, is too low to explain growth. Note that the genes coding for FBP aldolase class IA and ADH synthase are closely related and most BLAST searches result in the same hit for both genes (marked in light blue). Only a few Archaea possess FBP aldolase of class IA that are highly similar to the characterized *Thermococcus kodakarensis* enzyme. It appears that the halobacteria and the methanogens that lack FBP aldolase/phosphatase contain another FBP aldolase, which is only distantly related to these class IA enzymes<sup>3,4</sup> (and therefore require an additional monofunctional FBP phosphatase, see above). The parasitic Archaeon *Nanoarchaeum equitans* does not have a gene for any aldolase or phosphatase and is unable to synthesize any building blocks.

| Group                                    | Organism                                                   | FBP aldolase/ phosphatase<br><i>Thermococcus kodakarensis</i> |           | FBP aldolase class IA<br><i>Thermococcus kodakarensis</i> |           | ADH synthase<br><i>Methanocaldococcus jannaschii</i> |           | DAHP synthase<br><i>Pyrococcus furiosus</i> |           | FBP phosphatase class I<br><i>Escherichia coli</i> |           | FBP phosphatase class II<br><i>Escherichia coli</i> |           | FBP phosphatase class IV<br><i>Methanocaldococcus jannaschii</i> |           |        |
|------------------------------------------|------------------------------------------------------------|---------------------------------------------------------------|-----------|-----------------------------------------------------------|-----------|------------------------------------------------------|-----------|---------------------------------------------|-----------|----------------------------------------------------|-----------|-----------------------------------------------------|-----------|------------------------------------------------------------------|-----------|--------|
|                                          |                                                            | Expect value                                                  | Accession | Expect value                                              | Accession | Expect value                                         | Accession | Expect value                                | Accession | Expect value                                       | Accession | Expect value                                        | Accession | Expect value                                                     | Accession |        |
| Crenarchaeota                            | <i>Hyperthermus butylicus</i> DSM 5456                     | 2E-151                                                        | A20K38    | 1E-63                                                     | A218L5    | 7E-23                                                | A20M45    | 2E-90                                       | A20I87    | 4E-01                                              | A21P99    | 9E-01                                               | A20K32    | 9E-30                                                            | A20N76    |        |
|                                          | <i>Staphylothermus marinus</i> F1                          | 6E-147                                                        | A3DM22    | 2E-89                                                     | A3DPX0    | 4E-42                                                | A3DPX0    | 5E-01                                       | A3DL12    | 1E-02                                              | A3DL25    | 1E+00                                               | A3DP90    | 2E-17                                                            | A3DL25    |        |
|                                          | <i>Thermofilum pendens</i> Hrk5                            | 4E-135                                                        | A1RW66    | 3E-75                                                     | A1S0R3    | 2E-43                                                | A1RYF8    | 2E-02                                       | A1RY24    | 1E+00                                              | A1RW00    | 2E-02                                               | A1RZK1    | 3E-18                                                            | A1RW00    |        |
|                                          | <i>Ignicoccus hospitalis</i> KIN41                         | 9E-147                                                        | A8A9E4    | 5E-03                                                     | A8A8T8    | 2E-01                                                | A8A9U2    | 2E-88                                       | A8ACG0    | 1E-03                                              | A8A9C4    | 3E-01                                               | A8A8G2    | 2E-17                                                            | A8A9C4    |        |
|                                          | <i>Sulfolobus tokodaii</i> str.7                           | 8E-133                                                        | Q975V5    | 9E-32                                                     | Q96Y18    | 3E-39                                                | Q96Y18    | 1E-82                                       | Q96Y97    | 7E-02                                              | Q974W3    | 4E+00                                               | Q96Z29    | 5E-23                                                            | Q974W3    |        |
|                                          | <i>Sulfolobus acidocaldarius</i> DSM 639                   | 1E-131                                                        | Q4JAX4    | 4E-03                                                     | Q4JL33    | 4E-04                                                | Q4JAA6    | 2E-82                                       | Q4IC77    | 3E-01                                              | Q4JAF3    | 2E+00                                               | Q4JF32    | 1E-23                                                            | Q4JAA8    |        |
|                                          | <i>Sulfolobus solfataricus</i> P2                          | 4E-131                                                        | Q980K6    | 9E-32                                                     | Q97J03    | 6E-40                                                | Q97J03    | 6E-81                                       | Q980J0    | 1E+00                                              | Q97VZ6    | 9E-02                                               | Q97U17    | 1E-24                                                            | Q97W26    |        |
|                                          | <i>Metataphaeus sedula</i> DSM 5348                        | 6E-129                                                        | A4VY25    | 4E-30                                                     | A4V0B2    | 6E-34                                                | A4V0B2    | 7E-81                                       | A4V1M4    | 3E-01                                              | A4V1M4    | 2E-01                                               | A4V1C0    | 3E-25                                                            | A4V1E6    |        |
|                                          | <i>Pyrobaculum arsenaticum</i> DSM 13514                   | 8E-131                                                        | A4WH89    | 3E-03                                                     | A4WH86    | 6E-02                                                | A4WLK3    | 3E-76                                       | A4WMN6    | 3E-02                                              | A4WL73    | 1E-01                                               | A4W1E8    | 2E-11                                                            | A4WL73    |        |
|                                          | <i>Pyrobaculum caldifortis</i> JCM 11548                   | 1E-130                                                        | A3MSD2    | 7E-04                                                     | A3MSN0    | 5E-02                                                | A3MV24    | 5E-75                                       | A3MUK0    | 2E-01                                              | A3MXA8    | 9E-01                                               | A3MY99    | 2E-07                                                            | A3MUT7    |        |
|                                          | <i>Pyrobaculum aerophilum</i> str. JM2                     | 1E-130                                                        | Q8ZY51    | 6E-03                                                     | Q8ZU00    | 2E-01                                                | Q8ZT09    | 6E-77                                       | Q8ZW76    | 2E-02                                              | Q8ZV73    | 2E-02                                               | Q8ZV73    | 8E-09                                                            | Q8ZTW9    |        |
|                                          | <i>Pyrobaculum islandicum</i> DSM 4184                     | 6E-130                                                        | A1RTR7    | 8E-03                                                     | A1RU66    | 3E-04                                                | A1RR49    | 7E-78                                       | A1RV55    | 9E-02                                              | A1RRP5    | 4E-01                                               | A1RQ28    | 2E-11                                                            | A1RRP5    |        |
|                                          | <i>Thermoproteus neutrophilus</i> V245a                    | 1E-129                                                        | B1YAL1    | 8E-03                                                     | B1Y889    | 3E-04                                                | B1Y8F3    | 7E-78                                       | B1YD58    | 7E-02                                              | B1Y8E3    | 3E-01                                               | B1Y1C7    | 9E-12                                                            | B1YAE3    |        |
|                                          | <i>Caldiverga moquilingensis</i> IC-167                    | 2E-129                                                        | A8M0X2    | 3E-43                                                     | A8M8E0    | 9E-43                                                | A8M8E0    | 5E-88                                       | A8M8V6    | 3E-01                                              | A8M8Q0    | 2E-01                                               | A8M1A8    | 9E-24                                                            | A8M8Q0    |        |
|                                          | <i>Aeropyrum pernix</i> K1                                 | 3E-146                                                        | Q9YD03    | 6E-75                                                     | Q9YG90    | 5E-43                                                | Q9YG90    | 2E-86                                       | Q9Y1E7    | 3E-01                                              | Q9YR22    | 3E-01                                               | Q9Y1C0    | 4E-17                                                            | Q9Y4Z7    |        |
|                                          | Euryarchaeota                                              | <i>Pyrococcus abyssi</i> G5                                   | 0E+00     | Q9U248                                                    | 5E-148    | Q9V216                                               | 6E-38     | Q9V216                                      | 1E-132    | Q9V110                                             | 3E-01     | Q9V126                                              | 8E-01     | Q9V214                                                           | 8E-66     | Q9V126 |
|                                          |                                                            | <i>Pyrococcus furiosus</i> DSM 3638                           | 0E+00     | Q8U359                                                    | 2E-152    | P58314                                               | 2E-38     | P58314                                      | 3E-147    | Q8U0A9                                             | 4E-01     | Q8T277                                              | 7E-01     | Q8U1B5                                                           | 4E-66     | Q7W303 |
|                                          |                                                            | <i>Pyrococcus horikoshii</i> OT3                              | 0E+00     | OS8501                                                    | 1E-150    | OS7840                                               | 8E-41     | OS7840                                      | 3E-01     | OS9284                                             | 8E-01     | OS9523                                              | 8E-01     | OS7790                                                           | 8E-62     | OS9523 |
|                                          |                                                            | <i>Thermococcus annularius</i> NA1                            | 0E+00     | B6YTP6                                                    | 2E-150    | B6YWC8                                               | 3E-36     | B6YWC8                                      | 2E-127    | B6YX08                                             | 6E-03     | B6YX01                                              | 4E-01     | B6Y1Q1                                                           | 8E-69     | B6YW30 |
| <i>Thermococcus kodakarensis</i> KOD1    |                                                            | 0E+00                                                         | Q8NKP9    | 6E-163                                                    | Q8J308    | 3E-39                                                | Q8J308    | 4E-126                                      | Q8JF90    | 3E-02                                              | Q8JH93    | 4E-01                                               | Q8J587    | 2E-58                                                            | Q8JH93    |        |
| <i>Thermoplasma volcanium</i> GS1        |                                                            | 5E-141                                                        | Q978E7    | 6E-03                                                     | Q979Y3    | 1E+00                                                | Q97AM4    | 2E-71                                       | Q978P0    | 6E-02                                              | Q97A11    | 5E-01                                               | Q97CM1    | 3E-02                                                            | Q97859    |        |
| <i>Picrophilus torridus</i> DSM 9790     |                                                            | 6E-140                                                        | Q6L0W0    | 1E-01                                                     | Q6KZ36    | 2E-01                                                | Q6L2P2    | 1E-75                                       | Q6L278    | 9E-01                                              | Q6L0F7    | 2E+00                                               | Q6L1N1    | 2E-02                                                            | Q6L1N1    |        |
| <i>Thermoplasma acidophilum</i> DSM 1728 |                                                            | 2E-139                                                        | Q9H1B3    | 3E-03                                                     | Q9HK55    | 3E-01                                                | Q7A110    | 3E-69                                       | Q9H1U1    | 4E-01                                              | Q9H130    | 2E+00                                               | Q9H137    | 2E-01                                                            | Q9H1V4    |        |
| <i>Archaeoglobus fulgidus</i> DSM 4304   |                                                            | 8E-163                                                        | Q28830    | 2E-40                                                     | Q30128    | 1E-94                                                | Q30128    | 1E+00                                       | Q28479    | 1E+00                                              | Q29233    | 9E-01                                               | Q28856    | 9E-32                                                            | Q30298    |        |
| Korarchaeota                             |                                                            | <i>Candidatus 'Korarchaeum cryptofilum'</i> OPF8              | 4E-138    | B1L6Y4                                                    | 1E-31     | B1L310                                               | 2E-88     | B1L310                                      | 1E-01     | B1LSU2                                             | 2E-02     | B1L7E3                                              | 3E-03     | B1L206                                                           | 4E-19     | B1L7E3 |
| Methanogenic Euryarchaeota               | <i>Methanocaldococcus jannaschii</i> DSM 2661              | 2E-138                                                        | Q37747    | 2E-39                                                     | Q37843    | 1E-157                                               | Q37843    | 7E-06                                       | Q38465    | 1E+00                                              | Q38239    | 6E-03                                               | Q38058    | 3E-45                                                            | Q37573    |        |
|                                          | <i>Methanosarcina thermophila</i> PT                       | 1E-164                                                        | A0B8T5    | 9E-39                                                     | A0B6T4    | 1E-98                                                | A0B6T4    | 7E-01                                       | A0B831    | 7E-01                                              | A0B7E6    | 3E-01                                               | A0B7W5    | 1E-24                                                            | A0B7E6    |        |
|                                          | <i>Methanopyrus kandleri</i> AV19                          | 4E-147                                                        | Q8TWS8    | 1E-45                                                     | Q8TV10    | 1E-98                                                | Q8TV10    | 2E-03                                       | Q8TW00    | 2E-02                                              | Q8TUS9    | 8E-01                                               | Q8T266    | 3E-16                                                            | Q8TQ03    |        |
|                                          | <i>Methanobrevibacter smithii</i> ATCC 35061               | 3E-144                                                        | ASUKU2    | 4E-41                                                     | ASUJ83    | 2E-100                                               | ASUJ83    | 2E-01                                       | ASUNX1    | 4E-01                                              | ASULK6    | 8E-01                                               | ASUMK2    | 4E-27                                                            | ASULK6    |        |
|                                          | <i>Methanothermobacter thermautotrophicus</i> str. Delta H | 1E-142                                                        | O27721    | 5E-40                                                     | O26679    | 7E-100                                               | O26679    | 1E+00                                       | O26359    | 5E-02                                              | O26359    | 2E-01                                               | O27345    | 1E-34                                                            | O26957    |        |
|                                          | <i>Methanosphaera stadtmanae</i> DSM 3091                  | 4E-138                                                        | Q2NGI0    | 2E-40                                                     | Q2NH25    | 1E-92                                                | Q2NH25    | 5E-01                                       | Q2NE56    | 5E-02                                              | Q2NEP7    | 1E-01                                               | Q2NE22    | 4E-26                                                            | Q2NEP7    |        |
|                                          | <i>Methanococcus vannielii</i> SB                          | 8E-132                                                        | AGUWJ3    | 2E-35                                                     | AGUSC8    | 3E-126                                               | AGUSC8    | 2E-01                                       | AGUJ03    | 4E-01                                              | AGUNC9    | 1E-01                                               | AGUW25    | 6E-33                                                            | AGUJ02    |        |
|                                          | <i>Methanococcus marisnigri</i> C7                         | 3E-131                                                        | AGVWV6    | 2E-38                                                     | AGVZ00    | 2E-123                                               | AGVZ00    | 7E-01                                       | AGVG04    | 4E-01                                              | AGVHA3    | 9E-02                                               | AGVFC7    | 5E-38                                                            | AGVHT4    |        |
|                                          | <i>Methanococcus marisnigri</i> C5                         | 6E-129                                                        | A9A6N7    | 1E-38                                                     | A9A799    | 3E-124                                               | A9A799    | 5E-01                                       | A9AA11    | 9E-02                                              | A9A8X5    | 5E-02                                               | A9A6L4    | 2E-37                                                            | A9A8X5    |        |
|                                          | <i>Methanococcus marisnigri</i> JR1                        | 1E-128                                                        | A4FZM1    | 9E-39                                                     | A4FYB3    | 3E-124                                               | A4FYB3    | 2E-03                                       | A4FX91    | 3E-01                                              | A4FZT1    | 1E-02                                               | A4FZB4    | 4E-37                                                            | A4FWS4    |        |
|                                          | <i>Methanococcus aeolicus</i> Nankai-3                     | 6E-126                                                        | AGUT12    | 2E-38                                                     | AGUT72    | 6E-122                                               | AGUT72    | 2E-03                                       | AGUJ04    | 5E-01                                              | AGUW17    | 1E-01                                               | AGU1R1    | 3E-33                                                            | AGUWH3    |        |
|                                          | <i>Candidatus 'Methanoregella boonei'</i> GA8              | 2E-118                                                        | A789B8    | 7E-37                                                     | A78184    | 4E-85                                                | A78184    | 8E-01                                       | A78A83    | 5E-40                                              | A78B86    | 4E-01                                               | A78F80    | 7E-26                                                            | A78B86    |        |
|                                          | <i>Conarchaeum symbiosum</i> A                             | 3E-78                                                         | ADRJ30    | 2E-30                                                     | ADRJ26    | 1E-66                                                | ADRJ26    | 5E-02                                       | ADRW57    | 2E-01                                              | ADRYS3    | 3E+00                                               | ADRJ72    | 4E-24                                                            | ADRYS3    |        |
|                                          | <i>Nitrososphaera marisnigri</i> SCM1                      | 1E-78                                                         | A9A3J9    | 2E-35                                                     | A9A236    | 6E-70                                                | A9A236    | 6E-05                                       | A9A1R0    | 1E-01                                              | A9A571    | 4E+00                                               | A9A3P9    | 5E-27                                                            | A9A336    |        |
|                                          | Halophilic Euryarchaeota                                   | <i>Halobacterium salinarum</i> R1                             | 2E-01     | Q9H8R3                                                    | 2E-36     | Q9H588                                               | 5E-56     | Q9H588                                      | 9E-02     | Q9H5A5                                             | 4E-33     | Q9H911                                              | 4E-02     | Q9H9Y3                                                           | 9E-04     | Q9H912 |
|                                          |                                                            | <i>Natronomonas pharaonis</i> DSM 2160                        | 6E-01     | Q3IU14                                                    | 9E-39     | Q3IS18                                               | 7E-57     | Q3IQC5                                      | 1E+00     | Q3IRY6                                             | 2E-36     | Q3IS19                                              | 6E-02     | Q3IM55                                                           | 4E-05     | Q3INW7 |
|                                          |                                                            | <i>Halorubrum lacusprofundi</i> ATCC 49239                    | 8E-01     | A7D4Z3                                                    | 2E-35     | A7D0X8                                               | 9E-62     | A7D5Z7                                      | 2E-02     | A7D548                                             | 4E-37     | A7D0X9                                              | 5E-02     | A7D5W9                                                           | 7E-08     | A7D579 |
|                                          |                                                            | <i>Halorubrum marismortui</i> ATCC 43049                      | 1E+00     | Q5V7U6                                                    | 5E-34     | Q5V141                                               | 3E-62     | Q5V141                                      | 3E-01     | Q5V692                                             | 3E-37     | Q5V321                                              | 2E-03     | Q5V674                                                           | 2E-14     | Q5V1W9 |
|                                          | Methanogenic Euryarchaeota                                 | <i>Haloquadratum walsbyi</i> DSM 16790                        | 5E+00     | Q185E9                                                    | 2E-39     | Q182Y5                                               | 2E-59     | Q182Y5                                      | 5E+00     | Q182Y9                                             | 7E-29     | Q181E3                                              | 2E-02     | Q181E3                                                           | 3E-17     | Q185E9 |
| Methanogenic Euryarchaeota               | <i>Candidatus 'Methanosphaerula palustris'</i> E1-9c       | 1E-37                                                         | B6Y9R8    | 1E-34                                                     | B6Y9E1    | 5E-82                                                | B6Y9Z2    | 3E-01                                       | B6YF44    | 7E-44                                              | B6Y6Y7    | 4E-01                                               | B6Y8T0    | 1E-26                                                            | B6Y6Y5    |        |
|                                          | <i>Methanocorpusculum labreanum</i> Z                      | 9E-06                                                         | A25T38    | 8E-33                                                     | A25U09    | 6E-89                                                | A25U09    | 4E-01                                       | A25T91    | 6E-46                                              | A25T39    | 7E-02                                               | A25U08    | 1E-28                                                            | A25Q77    |        |
|                                          | <i>Methanospirillum hungatei</i> JF-1                      | 1E-02                                                         | Q2FR28    | 1E-33                                                     | Q2FQ50    | 2E-83                                                | Q2FQ49    | 3E-01                                       | Q2FQ63    | 3E-45                                              | Q2FM20    | 1E+00                                               | Q2FPW5    | 1E-27                                                            | Q2FQ94    |        |
|                                          | <i>Methanosarcina acetivorans</i> CZA                      | 5E-01                                                         | Q8TKB8    | 5E-39                                                     | Q8TJ12    | 6E-100                                               | Q8THC6    | 8E-01                                       | Q8TPM1    | 6E-02                                              | Q8TKQ4    | 5E-60                                               | Q8TRM3    | 3E-32                                                            | Q8TKQ4    |        |
|                                          | <i>Methanosarcina barkeri</i> str. fusaro                  | 5E-01                                                         | Q46E66    | 3E-41                                                     | Q46E61    | 6E-101                                               | Q46D29    | 2E-01                                       | Q466R1    | 5E-02                                              | Q46AH4    | 5E-99                                               | Q46E65    | 3E-34                                                            | Q46AH4    |        |
|                                          | <i>Methanococcus burtoni</i> DSM 6242                      | 7E-01                                                         | Q12WA3    | 6E-39                                                     | Q12U16    | 8E-104                                               | Q12U16    | 2E-02                                       | Q12VW6    | 6E-01                                              | Q12XW3    | 4E-56                                               | Q12W44    | 1E-33                                                            | Q12XW3    |        |
|                                          | <i>Methanosarcina mazei</i> Go1                            | 2E+00                                                         | Q8Q0S8    | 7E-38                                                     | Q8PW62    | 4E-101                                               | Q8PVE9    | 1E+00                                       | Q8PY62    | 6E-02                                              | Q8PTD2    | 2E-58                                               | Q8PU27    | 2E-33                                                            | Q8PTD2    |        |
|                                          | <i>uncultured methanogenic archaeon</i> RC-1               | 8E-01                                                         | Q0W3C1    | 2E-38                                                     | Q0W650    | 1E-94                                                | Q0W130    | 2E-01                                       | Q0W4D3    | 8E-03                                              | Q0W1B8    | 1E-01                                               | Q0W4U0    | 2E-15                                                            | Q0W1B8    |        |

**Table S12 Purification of recombinant FBP aldolase/phosphatase of *Ignicoccus hospitalis* from *E. coli* cells.** 1 U = 1  $\mu\text{mol min}^{-1}$ .

| Step               | Total protein / [mg] | Phosphatase activity |                            |             |                      | Aldolase activity |                            |             |                      |
|--------------------|----------------------|----------------------|----------------------------|-------------|----------------------|-------------------|----------------------------|-------------|----------------------|
|                    |                      | Activity / [U]       | Specific activity / [U/mg] | Yield / [%] | Purification [-fold] | Activity / [U]    | Specific activity / [U/mg] | Yield / [%] | Purification [-fold] |
| Heat-precipitation | 13.3                 | 3.2                  | 0.24                       | 100         | 1.0                  | 1.8               | 0.14                       | 100         | 1.0                  |
| Gel filtration     | 3.7                  | 1.5                  | 0.41                       | 46          | 1.7                  | 1.2               | 0.31                       | 63          | 2.3                  |
| MonoQ              | 1.6                  | 1.1                  | 0.70                       | 34          | 2.9                  | 0.9               | 0.55                       | 47          | 4.0                  |



**Table S13** PCR primers and conditions used for amplification of the FBP aldolase/phosphatase gene from different organisms. The restriction sites introduced by the primers are underlined.

| Organism                                | Gene ID and synonym                                  | Forward primer                                            | Reverse Primer                                                | Restriction sites   | Annealing temp. / [°C] | Elongation time | Expression vector   | Affinity tag                    | Plasmid name             |
|-----------------------------------------|------------------------------------------------------|-----------------------------------------------------------|---------------------------------------------------------------|---------------------|------------------------|-----------------|---------------------|---------------------------------|--------------------------|
| <i>Ignicoccus hospitalis</i>            | <a href="#">5563123</a><br><a href="#">Igni_0363</a> | AGATATAC-<br><u>CATATG</u> CCCCCTAGTGGC<br>CCAG           | GCAGA <u>AAGCTT</u> GTGGA-<br>TAAGGGTAG                       | <i>NdeI/HindIII</i> | 60                     | 2 min<br>35 sec | pT7-7               | -                               | FBP_I.hosp-<br>X-pT7-7   |
| <i>Ignicoccus hospitalis</i>            | <a href="#">5563123</a><br><a href="#">Igni_0363</a> | AGATATAC-<br><u>CATATG</u> CCCCCTAGTGGC<br>CCAG           | GCAGA <u>AAGCTT</u> GTGGA-<br>TAAGGGTAG                       | <i>NdeI/HindIII</i> | 60                     | 2 min<br>35 sec | pET16b<br>(Novagen) | His <sub>10</sub><br>N-terminal | FBP_I.hosp-<br>X-pET16b  |
| <i>Sulfolobus tokodaii</i>              | <a href="#">1458230</a><br><a href="#">ST0318</a>    | GCGCCGCGGGG <u>CATAT-</u><br>GATGAAAACTACTA-<br>TAAG      | GCGGGCGGGG <u>GCTCTA</u><br>GATAAAATTAAGATAAAAG               | <i>NdeI/XbaI</i>    | 40                     | 4 min<br>55 sec | pT7-7               | -                               | FBP_S.tok-<br>X-pT7-7    |
| <i>Metallosphaera sedula</i>            | <a href="#">5104211</a><br><a href="#">Msed_2259</a> | GCCGCGGGC <u>CATATGA-</u><br>GATCTACTGTTAGTG              | CGGCC <u>CAAGCTT</u> GTGTT<br>ATCGTCGAG                       | <i>NdeI/HindIII</i> | 50                     | 4 min<br>50 sec | pT7-7               | -                               | FBP_M.sed-<br>X-pT7-7    |
| <i>Thermoproteus neutrophilus</i>       | <a href="#">6164372</a><br><a href="#">Tneu_0133</a> | AACC-<br>TATCC <u>CATATG</u> CGGGTT<br>ACGGTTTCC          | CCCTGGGAAAC <u>CTCTA-</u><br>GACTCCTCCGACCTCAC                | <i>NdeI/XbaI</i>    | 55                     | 5 min           | pT7-7               | -                               | FBP_T.neut-<br>X-pT7-7   |
| <i>Thermoproteus neutrophilus</i>       | <a href="#">6164372</a><br><a href="#">Tneu_0133</a> | AACC-<br>TATCC <u>CATATG</u> CGGGTT<br>ACGGTTTCC          | CCCTGGGAAAC <u>CTCTA-</u><br>GACTCCTCCGACCTCAC                | <i>NdeI/XbaI</i>    | 55                     | 5 min           | pET16b<br>(Novagen) | His <sub>10</sub><br>N-terminal | FBP_T.neut-<br>X-pET16b  |
| <i>Thermoproteus neutrophilus</i>       | <a href="#">6164372</a><br><a href="#">Tneu_0133</a> | CTGAGAGTGCAC-<br><u>CATATG</u> CGGGTTACGGT<br>TTCC        | ACGCGCCACAT <u>C-</u><br><u>TCGAGGTC</u> GTGTTGA-<br>GAC      | <i>NdeI/XhoI</i>    | 55                     | 4 min<br>55 sec | pET23b<br>(Novagen) | His <sub>6</sub><br>C-terminal  | FBP_T.neut-<br>X-pET23b  |
| <i>Thermococcus kadakarensis</i>        | <a href="#">3235025</a><br><a href="#">TK2164</a>    | CCGGTGGTT <u>CATATGGC</u><br>CGTTGGAGATAAG                | GAACA-<br><u>GAAGCTT</u> GTGGAAT-<br>CACTCGA-<br>TAGGCTCGAACC | <i>NdeI/HindIII</i> | 60                     | 4 min<br>40 sec | pT7-7               | -                               | FBP_T.kod-<br>X-pT7-7    |
| <i>Methanothermobacter marburgensis</i> | RMMA00378<br>chromo-<br>some_326124<br>_325027       | GGGCGGCTGGAGGTGT<br><u>ACATATG</u> AAAAACAAC-<br>CATTAGTG | CGCGGTGTGGGTGGA <u>AG</u><br><u>CTTCTTTAATC-</u><br>CATGTCCTC | <i>NdeI/HindIII</i> | 60                     | 4 min<br>40 sec | pT7-7               | -                               | FBP_M.mar-<br>X-pT7-7    |
| <i>Moorella thermoacetica</i>           | <a href="#">3831377</a><br><a href="#">Moth_2266</a> | GGGCAAG-<br>GAGGCTGTGCT <u>CATATG</u><br>GGTAAAAGGATTAC   | AGCGGAAT <u>TCCGCCTA</u><br>TTTGGCTCCC                        | <i>NdeI/EcoRI</i>   | 60                     | 4 min<br>40 sec | pT7-7               | -                               | FBP_M.thac-<br>X-pT7-7   |
| <i>Thermus thermophilus</i>             | <a href="#">2776039</a><br><a href="#">TTC0616</a>   | AGGAGGTGAG <u>CATAT-</u><br><u>G</u> AAGGTACACCTTGAG      | AAAGTGAA-<br><u>GAAGCTT</u> GACCCGGGAG<br>CC                  | <i>NdeI/HindIII</i> | 55                     | 4 min<br>40 sec | pT7-7               | -                               | FBP_T.ther-<br>m-X-pT7-7 |

- 1 Grochowski, L. L. & White, R. H. Promiscuous anaerobes: new and unconventional metabolism in methanogenic archaea. *Ann N Y Acad Sci* **1125**, 190-214 (2008).
- 2 Samland, A. K., Wang, M. & Sprenger, G. A. MJ0400 from *Methanocaldococcus jannaschii* exhibits fructose-1,6-bisphosphate aldolase activity. *FEMS Microbiol Lett* **281**, 36-41 (2008).
- 3 Altekar, W. & Dhar, N. M. Archaeobacterial class I and class II aldolases from extreme halophiles. *Orig Life Evol Biosph* **18**, 59-64 (1988).
- 4 Krishnan, G. & Altekar, W. An unusual class I (Schiff base) fructose-1,6-bisphosphate aldolase from the halophilic archaeobacterium *Haloarcula vallismortis*. *Eur J Biochem* **195**, 343-350 (1991).
